# Supplementary material for: Phosphine-mediated reaction of 3-methyl allenoate and isatins: a protocol for the synthesis of spirofuran oxindoles
Source: Royal Society of Chemistry journal article supplement (doi:10.1039/c5ob00123d), 2015-01-01
Supplement: c5ob00123d1.pdf [file c5ob00123d1.pdf]

## Supporting Information

### Phosphine-Mediated Reaction of 3-Methyl Allenolate and Isatins: A Protocol for the Synthesis of Spirofuran Oxindoles

Anu Jose,<sup>a</sup> Jayakrishnan A. J.,<sup>a</sup> Seetha Lakshmi K. C.,<sup>a</sup> Sunil Varughese,<sup>a</sup> and Vijay Nair<sup>\*a</sup>

<sup>a</sup> Chemical Science and Technology Division, CSIR-National Institute for Interdisciplinary Science and Technology (CSIR-NIIST), Trivandrum 695 019, India

E-mail: [vijaynair\\_2001@yahoo.com](mailto:vijaynair_2001@yahoo.com)

#### Contents

- (1) General remarks **S1**
- (2) General experimental procedure **S1**
- (3) Characterization data for compounds **S2**
- (4) <sup>1</sup>H and <sup>13</sup>C NMR spectra of compounds **S7**
- (5) ORTEP of compound **14 S22**

#### 1. General

Melting points were recorded on a Büchi melting point apparatus and are uncorrected. NMR spectra were recorded at 500 (<sup>1</sup>H) and 126 (<sup>13</sup>C) MHz on Bruker Avance DPX-500S MHz NMR spectrometer. Chemical shifts ( $\delta$ ) are reported relative to TMS (<sup>1</sup>H) and CDCl<sub>3</sub> (<sup>13</sup>C) as the internal standards. Coupling constant ( $J$ ) is reported in Hertz (Hz). Mass spectra were recorded under HRMS (ESI) using Thermo Scientific Exactive Orbitrap mass spectrometer. IR spectra were recorded on a Bruker Alpha-T FT-IR spectrophotometer. Allenolates were prepared using known literature procedures.<sup>1</sup> Isatins were purchased from Sigma-Aldrich and the *N*-protection was carried out using known procedures.<sup>2</sup> Gravity column chromatography was performed using silica gel and mixtures of petroleum ether-ethyl acetate were used for elution.

#### 2. General experimental procedure for the synthesis of spiro tetrahydrofuran oxindole derivatives

A solution of the isatin (0.5 mmol) and the allenolate (0.75 mmol) in dry THF (5 ml) was taken in a round bottom flask under argon atmosphere. To this solution triphenylphosphine (0.75 mmol) was added and stirred for 30 min. The crude product after

---

<sup>1</sup> Lang, R. W.; Hansen, H.-J. *Org. Synth. Coll. Vol.* **1990**, *7*, 232; 1984, 62, 202.

<sup>2</sup> Schmidt, M. S.; Reverdito, A. M.; Kremenichuzky, L.; Perillo, I. A.; Blanco, M. M. *Molecules* **2008**, *13*, 831

removal of the solvent was purified by column chromatography using 100-200 silica gel and 85:15 hexane: ethyl acetate as the eluent afforded spiro tetrahydrofuran oxindole derivative.

### 3. Characterization data for compounds

#### (*E*)-Ethyl 2-(1'-methyl-2'-oxo-3*H*-spiro[furan-2,3'-indoline]-5(4*H*)-ylidene)acetate (**8**)

|                                                                                   |                                                                                                                                                                                                                                                                                                                                                                                                                                                                                                                                                                                                                                                                                                                                                                                                                                                                                                                                                                                            |
|-----------------------------------------------------------------------------------|--------------------------------------------------------------------------------------------------------------------------------------------------------------------------------------------------------------------------------------------------------------------------------------------------------------------------------------------------------------------------------------------------------------------------------------------------------------------------------------------------------------------------------------------------------------------------------------------------------------------------------------------------------------------------------------------------------------------------------------------------------------------------------------------------------------------------------------------------------------------------------------------------------------------------------------------------------------------------------------------|
| 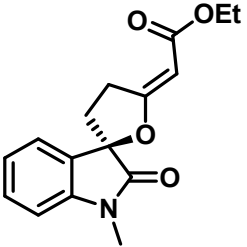 | <p>Yield: 126 mg (88%), pale yellow oil.</p> <p><b>IR</b> (film) <math>\nu_{\max}</math>: 1721, 1701, 1643, 1614, 1112, 1054 <math>\text{cm}^{-1}</math>.</p> <p><b><math>^1\text{H}</math> NMR</b> (500 MHz, <math>\text{CDCl}_3</math>): <math>\delta</math> 7.36 (t, <math>J = 7.5</math> Hz, 1H), 7.29 (d, <math>J = 7.5</math> Hz, 1H), 7.09 (t, <math>J = 7.5</math> Hz, 1H), 6.84 (d, <math>J = 8.0</math> Hz, 1H), 5.41 (s, 1H), 4.14 (q, <math>J = 7.0</math> Hz, 2H), 3.56 – 3.52 (m, 2H), 3.18 (d, <math>J = 1.5</math> Hz, 3H), 2.52 – 2.47 (m, 1H), 2.33 – 2.27 (m, 1H), 1.27 (t, <math>J = 7.0</math> Hz, 3H) ppm.</p> <p><b><math>^{13}\text{C}</math> NMR</b> (126 MHz, <math>\text{CDCl}_3</math>): <math>\delta</math> 175.0, 174.1, 167.8, 143.9, 130.8, 126.9, 123.9, 123.3, 108.6, 91.7, 85.5, 59.3, 33.0, 30.3, 26.2, 14.5 ppm.</p> <p><b>HRMS (ESI-MS)</b> calcd for <math>\text{C}_{16}\text{H}_{17}\text{NO}_4\text{Na}^+</math> 310.10553; Found: 310.10452.</p> |
|-----------------------------------------------------------------------------------|--------------------------------------------------------------------------------------------------------------------------------------------------------------------------------------------------------------------------------------------------------------------------------------------------------------------------------------------------------------------------------------------------------------------------------------------------------------------------------------------------------------------------------------------------------------------------------------------------------------------------------------------------------------------------------------------------------------------------------------------------------------------------------------------------------------------------------------------------------------------------------------------------------------------------------------------------------------------------------------------|

#### (*E*)-*Tert*-butyl 2-(1'-methyl-2'-oxo-3*H*-spiro[furan-2,3'-indoline]-5(4*H*)-ylidene)acetate (**9**)

|                                                                                    |                                                                                                                                                                                                                                                                                                                                                                                                                                                                                                                                                                                                                                                                                                                                                                                                                                                                                                    |
|------------------------------------------------------------------------------------|----------------------------------------------------------------------------------------------------------------------------------------------------------------------------------------------------------------------------------------------------------------------------------------------------------------------------------------------------------------------------------------------------------------------------------------------------------------------------------------------------------------------------------------------------------------------------------------------------------------------------------------------------------------------------------------------------------------------------------------------------------------------------------------------------------------------------------------------------------------------------------------------------|
| 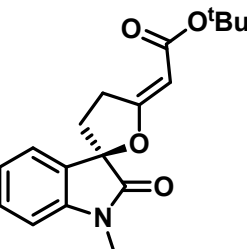 | <p>Yield: 129 mg (82%), pale yellow oil.</p> <p><b>IR</b> (film) <math>\nu_{\max}</math>: 1726, 1698, 1644, 1615, 1109, 1057 <math>\text{cm}^{-1}</math>.</p> <p><b><math>^1\text{H}</math> NMR</b> (500 MHz, <math>\text{CDCl}_3</math>): <math>\delta</math> 7.36 (t, <math>J = 7.5</math> Hz, 1H), 7.28 (d, <math>J = 7.5</math> Hz, 1H), 7.09 (t, <math>J = 7.5</math> Hz, 1H), 6.83 (d, <math>J = 8.0</math> Hz, 1H), 5.35 (s, 1H), 3.53 – 3.49 (m, 2H), 3.19 (s, 3H), 2.52 – 2.46 (m, 1H), 2.32 – 2.25 (m, 1H), 1.48 (s, 9H) ppm.</p> <p><b><math>^{13}\text{C}</math> NMR</b> (126 MHz, <math>\text{CDCl}_3</math>): <math>\delta</math> 174.3, 173.9, 167.3, 143.9, 130.8, 127.1, 123.9, 123.3, 108.6, 93.5, 85.1, 79.1, 33.15, 30.0, 28.4, 26.2 ppm.</p> <p><b>HRMS (ESI-MS)</b> calcd for <math>\text{C}_{18}\text{H}_{21}\text{NO}_4\text{Na}^+</math> 338.13683; Found: 338.13568.</p> |
|------------------------------------------------------------------------------------|----------------------------------------------------------------------------------------------------------------------------------------------------------------------------------------------------------------------------------------------------------------------------------------------------------------------------------------------------------------------------------------------------------------------------------------------------------------------------------------------------------------------------------------------------------------------------------------------------------------------------------------------------------------------------------------------------------------------------------------------------------------------------------------------------------------------------------------------------------------------------------------------------|

#### (*E*)-Ethyl 2-(1'-benzyl-2'-oxo-3*H*-spiro[furan-2,3'-indoline]-5(4*H*)-ylidene)acetate (**10**)

|                                                                                     |                                                                                                                                                                                                                                                                                                                                                                                                                                                                                                                                                                                                                                                                                                                                                                                                                                                                                                                                                                                    |
|-------------------------------------------------------------------------------------|------------------------------------------------------------------------------------------------------------------------------------------------------------------------------------------------------------------------------------------------------------------------------------------------------------------------------------------------------------------------------------------------------------------------------------------------------------------------------------------------------------------------------------------------------------------------------------------------------------------------------------------------------------------------------------------------------------------------------------------------------------------------------------------------------------------------------------------------------------------------------------------------------------------------------------------------------------------------------------|
| 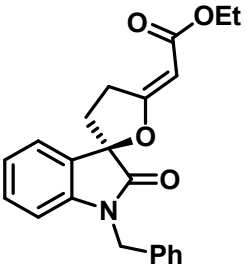 | <p>Yield: 131 mg (72%), pale yellow oil.</p> <p><b>IR</b> (film) <math>\nu_{\max}</math>: 1718 (broad), 1647, 1614, 1113, 1053 <math>\text{cm}^{-1}</math>.</p> <p><b><math>^1\text{H}</math> NMR</b> (500 MHz, <math>\text{CDCl}_3</math>): <math>\delta</math> 7.31 – 7.20 (m, 7H), 7.03 (t, <math>J = 7.5</math> Hz, 1H), 6.70 (d, <math>J = 8.0</math> Hz, 1H), 5.45 (s, 1H), 4.84 (q, <math>J = 16.0</math> Hz, 2H), 4.15 (q, <math>J = 7.0</math> Hz, 2H), 3.58 (t, <math>J = 7.5</math> Hz, 2H), 2.58 – 2.53 (m, 1H), 2.36 – 2.30 (m, 1H), 1.27 (t, <math>J = 7.0</math> Hz, 3H) ppm.</p> <p><b><math>^{13}\text{C}</math> NMR</b> (126 MHz, <math>\text{CDCl}_3</math>): <math>\delta</math> 175.0, 174.4, 167.8, 143.1, 135.1, 130.7, 128.9, 127.8, 127.2, 127.0, 124.1, 123.4, 109.7, 91.9, 85.5, 59.3, 43.8, 33.4, 30.3, 14.5 ppm.</p> <p><b>HRMS (ESI-MS)</b> calcd for <math>\text{C}_{22}\text{H}_{21}\text{NO}_4\text{Na}^+</math> 386.13683; Found: 386.13594.</p> |
|-------------------------------------------------------------------------------------|------------------------------------------------------------------------------------------------------------------------------------------------------------------------------------------------------------------------------------------------------------------------------------------------------------------------------------------------------------------------------------------------------------------------------------------------------------------------------------------------------------------------------------------------------------------------------------------------------------------------------------------------------------------------------------------------------------------------------------------------------------------------------------------------------------------------------------------------------------------------------------------------------------------------------------------------------------------------------------|

**(E)-Ethyl 2-(1'-ethyl-2'-oxo-3*H*-spiro[furan-2,3'-indoline]-5(4*H*)-ylidene)acetate (11)**

|                                                                                   |                                                                                                                                                                                                                                                                                                                                                                                                                                                                                                                                                                                                                                                                                                                                                                                                                                                                                                                                                                                        |
|-----------------------------------------------------------------------------------|----------------------------------------------------------------------------------------------------------------------------------------------------------------------------------------------------------------------------------------------------------------------------------------------------------------------------------------------------------------------------------------------------------------------------------------------------------------------------------------------------------------------------------------------------------------------------------------------------------------------------------------------------------------------------------------------------------------------------------------------------------------------------------------------------------------------------------------------------------------------------------------------------------------------------------------------------------------------------------------|
| 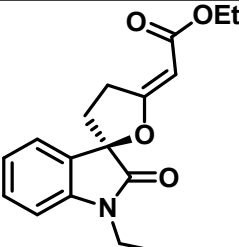 | <p>Yield: 117 mg (78%), pale yellow oil.</p> <p><b>IR</b> (film) <math>\nu_{\text{max}}</math>: 1722 (broad), 1648, 1615, 1117, 1059 <math>\text{cm}^{-1}</math>.</p> <p><b><math>^1\text{H}</math> NMR</b> (500 MHz, <math>\text{CDCl}_3</math>): <math>\delta</math> 7.34 (t, <math>J = 7.5</math> Hz, 1H), 7.29 (d, <math>J = 7.5</math> Hz, 1H), 7.07 (t, <math>J = 7.5</math> Hz, 1H), 6.84 (d, <math>J = 8.0</math> Hz, 1H), 5.42 (s, 1H), 4.15 (q, <math>J = 7.0</math> Hz, 2H), 3.73 (q, <math>J = 7.0</math> Hz, 2H), 3.56 – 3.53 (m, 2H), 2.53 – 2.48 (m, 1H), 2.32 – 2.26 (m, 1H), 1.30 – 1.25 (m, 6H) ppm.</p> <p><b><math>^{13}\text{C}</math> NMR</b> (126 MHz, <math>\text{CDCl}_3</math>): <math>\delta</math> 175.0, 173.8, 167.8, 143.0, 130.7, 127.2, 124.2, 123.1, 108.7, 91.7, 85.4, 59.2, 34.8, 33.1, 30.3, 14.5, 12.5 ppm.</p> <p><b>HRMS (ESI-MS)</b> calcd for <math>\text{C}_{17}\text{H}_{19}\text{NO}_4\text{Na}^+</math> 324.12118; Found: 324.11960.</p> |
|-----------------------------------------------------------------------------------|----------------------------------------------------------------------------------------------------------------------------------------------------------------------------------------------------------------------------------------------------------------------------------------------------------------------------------------------------------------------------------------------------------------------------------------------------------------------------------------------------------------------------------------------------------------------------------------------------------------------------------------------------------------------------------------------------------------------------------------------------------------------------------------------------------------------------------------------------------------------------------------------------------------------------------------------------------------------------------------|

**(E)-Ethyl 2-(2'-oxo-1'-(prop-2-ynyl)-3*H*-spiro[furan-2,3'-indoline]-5(4*H*)-ylidene)acetate (12)**

|                                                                                    |                                                                                                                                                                                                                                                                                                                                                                                                                                                                                                                                                                                                                                                                                                                                                                                                                                                                                                                   |
|------------------------------------------------------------------------------------|-------------------------------------------------------------------------------------------------------------------------------------------------------------------------------------------------------------------------------------------------------------------------------------------------------------------------------------------------------------------------------------------------------------------------------------------------------------------------------------------------------------------------------------------------------------------------------------------------------------------------------------------------------------------------------------------------------------------------------------------------------------------------------------------------------------------------------------------------------------------------------------------------------------------|
| 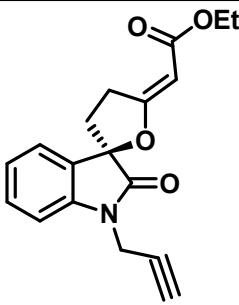 | <p>Yield: 106 mg (68%), colourless oil.</p> <p><b>IR</b> (film) <math>\nu_{\text{max}}</math>: 1719 (broad), 1648, 1614, 1112, 1055 <math>\text{cm}^{-1}</math>.</p> <p><b><math>^1\text{H}</math> NMR</b> (500 MHz, <math>\text{CDCl}_3</math>): <math>\delta</math> 7.38 (t, <math>J = 8.0</math> Hz, 1H), 7.30 (d, <math>J = 7.5</math> Hz, 1H), 7.12 (t, <math>J = 7.5</math> Hz, 1H), 7.06 (d, <math>J = 8.0</math> Hz, 1H), 5.35 (s, 1H), 4.55 (dd, <math>J_1 = 17.5</math> Hz, <math>J_2 = 1.5</math> Hz, 1H), 4.36 (dd, <math>J_1 = 18.0</math> Hz, <math>J_2 = 2.0</math> Hz, 1H), 3.52 – 3.49 (m, 2H), 2.54 – 2.49 (m, 1H), 2.33 – 2.23 (m, 2H), 1.48 (s, 9H) ppm.</p> <p><b><math>^{13}\text{C}</math> NMR</b> (126 MHz, <math>\text{CDCl}_3</math>): <math>\delta</math> 173.7, 173.4, 167.2, 142.0, 130.7, 127.1, 124.0, 123.7, 109.7, 93.7, 85.1, 79.1, 76.3, 72.9, 33.4, 29.9, 29.3, 28.4 ppm.</p> |
|------------------------------------------------------------------------------------|-------------------------------------------------------------------------------------------------------------------------------------------------------------------------------------------------------------------------------------------------------------------------------------------------------------------------------------------------------------------------------------------------------------------------------------------------------------------------------------------------------------------------------------------------------------------------------------------------------------------------------------------------------------------------------------------------------------------------------------------------------------------------------------------------------------------------------------------------------------------------------------------------------------------|

**(E)-Ethyl 2-(5'-bromo-1'-methyl-2'-oxo-3*H*-spiro[furan-2,3'-indoline]-5(4*H*)-ylidene)acetate (13)**

|                                                                                     |                                                                                                                                                                                                                                                                                                                                                                                                                                                                                                                                                                                                                                                                                                                                                                                                                                                                                                         |
|-------------------------------------------------------------------------------------|---------------------------------------------------------------------------------------------------------------------------------------------------------------------------------------------------------------------------------------------------------------------------------------------------------------------------------------------------------------------------------------------------------------------------------------------------------------------------------------------------------------------------------------------------------------------------------------------------------------------------------------------------------------------------------------------------------------------------------------------------------------------------------------------------------------------------------------------------------------------------------------------------------|
| 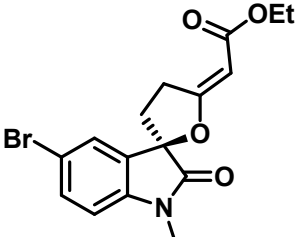 | <p>Yield: 99 mg (54%), pale yellow oil.</p> <p><b>IR</b> (film) <math>\nu_{\text{max}}</math>: 1729, 1705, 1650, 1612, 1118, 1059 <math>\text{cm}^{-1}</math>.</p> <p><b><math>^1\text{H}</math> NMR</b> (500 MHz, <math>\text{CDCl}_3</math>): <math>\delta</math> 7.48 (d, <math>J = 8.5</math> Hz, 1H), 7.40 (s, 1H), 6.71 (t, <math>J = 8.0</math> Hz, 1H), 5.41 (s, 1H), 4.15 (q, <math>J = 7.0</math> Hz, 2H), 3.55 – 3.52 (m, 2H), 3.18 (s, 3H), 2.53 – 2.48 (m, 1H), 2.32 – 2.26 (m, 1H), 1.29 (t, <math>J = 7.5</math> Hz, 3H) ppm.</p> <p><b><math>^{13}\text{C}</math> NMR</b> (126 MHz, <math>\text{CDCl}_3</math>) <math>\delta</math> 174.4, 173.6, 167.6, 142.9, 133.5, 129.1, 127.3, 115.9, 109.9, 92.2, 84.9, 59.4, 33.2, 30.1, 26.3, 14.5 ppm.</p> <p><b>HRMS (ESI-MS)</b> calcd for <math>\text{C}_{16}\text{H}_{16}\text{BrNO}_4\text{Na}^+</math> 388.01604; Found: 388.01486.</p> |
|-------------------------------------------------------------------------------------|---------------------------------------------------------------------------------------------------------------------------------------------------------------------------------------------------------------------------------------------------------------------------------------------------------------------------------------------------------------------------------------------------------------------------------------------------------------------------------------------------------------------------------------------------------------------------------------------------------------------------------------------------------------------------------------------------------------------------------------------------------------------------------------------------------------------------------------------------------------------------------------------------------|

**(E)-Ethyl 2-(1'-benzyl-5'-bromo-2'-oxo-3H-spiro[furan-2,3'-indoline]-5(4H)-ylidene) acetate (14)**

|                                                                                   |                                                                                                                                                                                                                                                                                                                                                                                                                                                                                                                                                                                                                                                                                                                                                                                                                                                                                                                                         |
|-----------------------------------------------------------------------------------|-----------------------------------------------------------------------------------------------------------------------------------------------------------------------------------------------------------------------------------------------------------------------------------------------------------------------------------------------------------------------------------------------------------------------------------------------------------------------------------------------------------------------------------------------------------------------------------------------------------------------------------------------------------------------------------------------------------------------------------------------------------------------------------------------------------------------------------------------------------------------------------------------------------------------------------------|
| 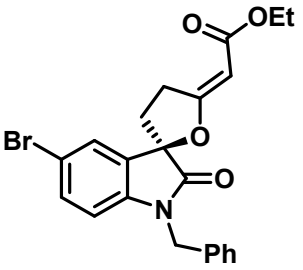 | <p>Yield: 157 mg (71%), colourless solid (mp 132-133 °C).<br/><b>IR</b> (film) <math>\nu_{\max}</math>: 1734 (broad), 1651, 1265, 1118 <math>\text{cm}^{-1}</math>.<br/><b><math>^1\text{H}</math> NMR</b> (500 MHz, <math>\text{CDCl}_3</math>): <math>\delta</math> 7.31 – 7.20 (m, 7H), 7.03 (t, <math>J</math> = 7.5 Hz, 1H), 6.70 (d, <math>J</math> = 8.0 Hz, 1H), 5.45 (s, 1H), 4.89 – 4.81 (m, 2H), 4.15 (q, <math>J</math> = 7.0 Hz, 2H), 3.59 – 3.56 (m, 2H), 2.58 – 2.53 (m, 1H), 2.36 – 2.30 (m, 1H), 1.27 (t, <math>J</math> = 7.0 Hz, 3H) ppm.<br/><b><math>^{13}\text{C}</math> NMR</b> (126 MHz, <math>\text{CDCl}_3</math>): <math>\delta</math> 174.4, 173.9, 167.7, 142.0, 134.6, 133.5, 129.0, 128.0, 127.4, 127.2, 116.1, 111.2, 92.3, 85.1, 59.5, 43.9, 33.5, 30.1, 14.5 ppm.<br/><b>HRMS (ESI-MS)</b> calcd for <math>\text{C}_{22}\text{H}_{20}\text{BrNO}_4\text{Na}^+</math> 464.04734; Found: 464.04697.</p> |
|-----------------------------------------------------------------------------------|-----------------------------------------------------------------------------------------------------------------------------------------------------------------------------------------------------------------------------------------------------------------------------------------------------------------------------------------------------------------------------------------------------------------------------------------------------------------------------------------------------------------------------------------------------------------------------------------------------------------------------------------------------------------------------------------------------------------------------------------------------------------------------------------------------------------------------------------------------------------------------------------------------------------------------------------|

**(E)-Tert-butyl 2-(1'-benzyl-5'-bromo-2'-oxo-3H-spiro[furan-2,3'-indoline]-5(4H)-ylidene) acetate (15)**

|                                                                                    |                                                                                                                                                                                                                                                                                                                                                                                                                                                                                                                                                                                                                                                                                                                                                                                                                                                                                                                                                 |
|------------------------------------------------------------------------------------|-------------------------------------------------------------------------------------------------------------------------------------------------------------------------------------------------------------------------------------------------------------------------------------------------------------------------------------------------------------------------------------------------------------------------------------------------------------------------------------------------------------------------------------------------------------------------------------------------------------------------------------------------------------------------------------------------------------------------------------------------------------------------------------------------------------------------------------------------------------------------------------------------------------------------------------------------|
| 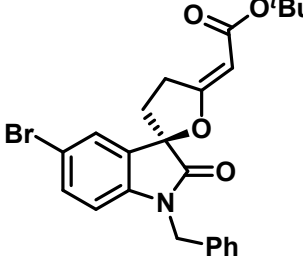 | <p>Yield: 122 mg (52%), pale yellow solid (m p 40-42°C).<br/><b>IR</b> (film) <math>\nu_{\max}</math>: 1734 (broad), 1651, 1265, 1114 <math>\text{cm}^{-1}</math>.<br/><b><math>^1\text{H}</math> NMR</b> (500 MHz, <math>\text{CDCl}_3</math>): <math>\delta</math> 7.40 (d, <math>J</math> = 7.0 Hz, 1H), 7.36 – 7.31 (m, 3H), 7.29 – 7.27 (m, 1H), 7.25 – 7.23 (m, 2H), 6.57 (d, <math>J</math> = 8.5 Hz, 1H), 5.39 (t, <math>J</math> = 1.5 Hz, 1H), 4.88 – 4.80 (m, 2H), 3.56 – 3.52 (m, 2H), 2.59 – 2.54 (m, 1H), 2.35 – 2.29 (m, 1H), 1.49 (s, 9H) ppm.<br/><b><math>^{13}\text{C}</math> NMR</b> (126 MHz, <math>\text{CDCl}_3</math>): <math>\delta</math> 174.1, 173.4, 167.2, 142.0, 134.6, 133.4, 129.3, 129.0, 128.0, 127.4, 127.2, 116.1, 111.1, 94.1, 84.8, 79.3, 43.9, 33.6, 29.9, 28.4 ppm.<br/><b>HRMS (ESI-MS)</b> calcd for <math>\text{C}_{24}\text{H}_{24}\text{BrNO}_4\text{Na}^+</math> 492.07864; Found: 492.07806</p> |
|------------------------------------------------------------------------------------|-------------------------------------------------------------------------------------------------------------------------------------------------------------------------------------------------------------------------------------------------------------------------------------------------------------------------------------------------------------------------------------------------------------------------------------------------------------------------------------------------------------------------------------------------------------------------------------------------------------------------------------------------------------------------------------------------------------------------------------------------------------------------------------------------------------------------------------------------------------------------------------------------------------------------------------------------|

**(E)-Tert-butyl 2-(5'-bromo-2'-oxo-1'-(prop-2-ynyl)-3H-spiro[furan-2,3'-indoline]-5(4H)-ylidene)acetate (16)**

|                                                                                     |                                                                                                                                                                                                                                                                                                                                                                                                                                                                                                                                                                                                                                                                                                                                                                                                                                                                                                                                                                                                                                                          |
|-------------------------------------------------------------------------------------|----------------------------------------------------------------------------------------------------------------------------------------------------------------------------------------------------------------------------------------------------------------------------------------------------------------------------------------------------------------------------------------------------------------------------------------------------------------------------------------------------------------------------------------------------------------------------------------------------------------------------------------------------------------------------------------------------------------------------------------------------------------------------------------------------------------------------------------------------------------------------------------------------------------------------------------------------------------------------------------------------------------------------------------------------------|
| 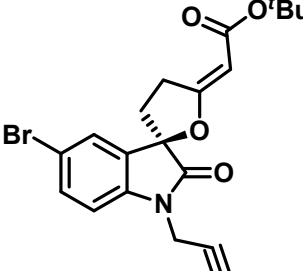 | <p>Yield: 127 mg (61%), yellow solid (m p 55-57°C).<br/><b>IR</b> (film) <math>\nu_{\max}</math>: 1737, 1702, 1649, 1265, 1114 <math>\text{cm}^{-1}</math>.<br/><b><math>^1\text{H}</math> NMR</b> (500 MHz, <math>\text{CDCl}_3</math>): <math>\delta</math> 7.51 (dd, <math>J_1</math> = 8.5 Hz, <math>J_2</math> = 2.0 Hz, 1H), 7.43 (d, <math>J</math> = 2.0 Hz, 1H), 6.96 (d, <math>J</math> = 8.0 Hz, 1H), 5.36 (t, <math>J</math> = 1.5 Hz, 1H), 4.54 (dd, <math>J_1</math> = 17.5 Hz, <math>J_2</math> = 2.5 Hz, 1H), 4.36 (dd, <math>J_1</math> = 18.0 Hz, <math>J_2</math> = 2.5 Hz, 1H), 3.52 – 3.48 (m, 2H), 2.55 – 2.50 (m, 1H), 2.32 – 2.25 (m, 1H), 1.49 (s, 9H) ppm.<br/><b><math>^{13}\text{C}</math> NMR</b> (126 MHz, <math>\text{CDCl}_3</math>): <math>\delta</math> 173.2, 173.0, 167.1, 141.0, 133.5, 129.1, 127.4, 116.4, 111.3, 94.1, 84.7, 79.4, 75.85, 73.28, 33.5, 29.8, 29.5, 28.4 ppm.<br/><b>HRMS (ESI-MS)</b> calcd for <math>\text{C}_{20}\text{H}_{20}\text{BrNO}_4\text{Na}^+</math> 440.04734; Found: 440.04630.</p> |
|-------------------------------------------------------------------------------------|----------------------------------------------------------------------------------------------------------------------------------------------------------------------------------------------------------------------------------------------------------------------------------------------------------------------------------------------------------------------------------------------------------------------------------------------------------------------------------------------------------------------------------------------------------------------------------------------------------------------------------------------------------------------------------------------------------------------------------------------------------------------------------------------------------------------------------------------------------------------------------------------------------------------------------------------------------------------------------------------------------------------------------------------------------|

**(E)-Ethyl 2-(5'-chloro-1'-methyl-2'-oxo-3H-spiro[furan-2,3'-indoline]-5(4H)-ylidene)acetate (17)**

|                                                                                   |                                                                                                                                                                                                                                                                                                                                                                                                                                                                                                                                                                                                                                                                                                                                                                                                                                                                                                    |
|-----------------------------------------------------------------------------------|----------------------------------------------------------------------------------------------------------------------------------------------------------------------------------------------------------------------------------------------------------------------------------------------------------------------------------------------------------------------------------------------------------------------------------------------------------------------------------------------------------------------------------------------------------------------------------------------------------------------------------------------------------------------------------------------------------------------------------------------------------------------------------------------------------------------------------------------------------------------------------------------------|
| 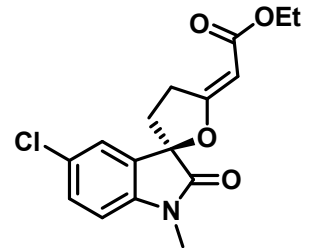 | <p>Yield: 122 mg (76%), colourless oil.</p> <p><b>IR</b> (film) <math>\nu_{\max}</math>: 1726, 1701, 1646, 1613, 1113, 1056 <math>\text{cm}^{-1}</math>.</p> <p><b><math>^1\text{H}</math> NMR</b> (500 MHz, <math>\text{CDCl}_3</math>): <math>\delta</math> 7.34 (d, <math>J = 8.5</math> Hz, 1H), 7.28 (s, 1H), 6.77 (t, <math>J = 8.0</math> Hz, 1H), 5.42 (s, 1H), 4.16 (q, <math>J = 8.0</math> Hz, 2H), 3.55 – 3.52 (m, 2H), 3.18 (s, 3H), 2.54 – 2.49 (m, 1H), 2.33 – 2.26 (m, 1H), 1.28 (t, <math>J = 7.0</math> Hz, 3H) ppm.</p> <p><b><math>^{13}\text{C}</math> NMR</b> (126 MHz, <math>\text{CDCl}_3</math>): <math>\delta</math> 174.5, 173.8, 167.7, 142.4, 130.7, 128.8, 128.6, 124.6, 109.6, 92.2, 85.1, 59.4, 33.2, 30.1, 26.4, 14.5 ppm.</p> <p><b>HRMS (ESI-MS)</b> calcd for <math>\text{C}_{16}\text{H}_{16}\text{ClNO}_4\text{Na}^+</math> 344.06656; Found: 344.06512.</p> |
|-----------------------------------------------------------------------------------|----------------------------------------------------------------------------------------------------------------------------------------------------------------------------------------------------------------------------------------------------------------------------------------------------------------------------------------------------------------------------------------------------------------------------------------------------------------------------------------------------------------------------------------------------------------------------------------------------------------------------------------------------------------------------------------------------------------------------------------------------------------------------------------------------------------------------------------------------------------------------------------------------|

**(E)-Tert-butyl 2-(5'-chloro-1'-methyl-2'-oxo-3H-spiro[furan-2,3'-indoline]-5(4H)-ylidene)acetate (18)**

|                                                                                    |                                                                                                                                                                                                                                                                                                                                                                                                                                                                                                                                                                                                                                                                                                                                                                                                                                                                  |
|------------------------------------------------------------------------------------|------------------------------------------------------------------------------------------------------------------------------------------------------------------------------------------------------------------------------------------------------------------------------------------------------------------------------------------------------------------------------------------------------------------------------------------------------------------------------------------------------------------------------------------------------------------------------------------------------------------------------------------------------------------------------------------------------------------------------------------------------------------------------------------------------------------------------------------------------------------|
| 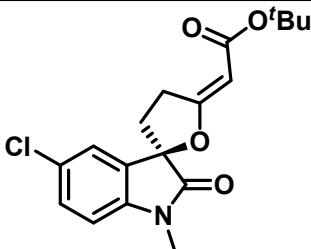 | <p>Yield: 126 mg (72%), colourless oil.</p> <p><b>IR</b> (film) <math>\nu_{\max}</math>: 1728, 1702, 1648, 1613, 1110, 1059 <math>\text{cm}^{-1}</math>.</p> <p><b><math>^1\text{H}</math> NMR</b> (500 MHz, <math>\text{CDCl}_3</math>): <math>\delta</math> 7.33 (dd, <math>J_1 = 8.5</math> Hz, <math>J_2 = 2.0</math> Hz, 1H), 7.26 (s, 1H), 6.76 (d, <math>J = 8.5</math> Hz, 1H), 5.34 (s, 1H), 3.52 – 3.48 (m, 2H), 3.18 (s, 3H), 2.52 – 2.47 (m, 1H), 2.30 – 2.24 (m, 1H), 1.48 (s, 9H) ppm.</p> <p><b><math>^{13}\text{C}</math> NMR</b> (126 MHz, <math>\text{CDCl}_3</math>): <math>\delta</math> 173.9, 173.4, 167.1, 142.4, 130.5, 129.0, 128.8, 124.6, 109.5, 93.9, 84.7, 79.2, 33.3, 29.8, 28.4, 26.3 ppm.</p> <p><b>HRMS (ESI-MS)</b> calcd for <math>\text{C}_{18}\text{H}_{20}\text{ClNO}_4\text{Na}^+</math> 372.09786; Found: 372.09601.</p> |
|------------------------------------------------------------------------------------|------------------------------------------------------------------------------------------------------------------------------------------------------------------------------------------------------------------------------------------------------------------------------------------------------------------------------------------------------------------------------------------------------------------------------------------------------------------------------------------------------------------------------------------------------------------------------------------------------------------------------------------------------------------------------------------------------------------------------------------------------------------------------------------------------------------------------------------------------------------|

**(E)-Ethyl 2-(1'-benzyl-5'-chloro-2'-oxo-3H-spiro[furan-2,3'-indoline]-5(4H)-ylidene)acetate (19)**

|                                                                                     |                                                                                                                                                                                                                                                                                                                                                                                                                                                                                                                                                                                                                                                                                                                                                                                                                                                                                                                                                                                                                                                                  |
|-------------------------------------------------------------------------------------|------------------------------------------------------------------------------------------------------------------------------------------------------------------------------------------------------------------------------------------------------------------------------------------------------------------------------------------------------------------------------------------------------------------------------------------------------------------------------------------------------------------------------------------------------------------------------------------------------------------------------------------------------------------------------------------------------------------------------------------------------------------------------------------------------------------------------------------------------------------------------------------------------------------------------------------------------------------------------------------------------------------------------------------------------------------|
| 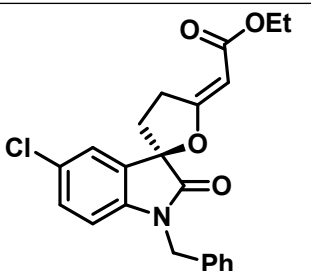 | <p>Yield: 151 mg (76%), yellow solid (m p 123-125 °C).</p> <p><b>IR</b> (film) <math>\nu_{\max}</math>: 1732, 1708, 1650, 1264, 1117 <math>\text{cm}^{-1}</math>.</p> <p><b><math>^1\text{H}</math> NMR</b> (500 MHz, <math>\text{CDCl}_3</math>): <math>\delta</math> 7.33 – 7.31 (m, 2H), 7.29 – 7.28 (m, 2H), 7.21 (dd, <math>J_1 = 8.5</math> Hz, <math>J_2 = 2.5</math> Hz, 1H), 6.62 (d, <math>J = 8.5</math> Hz, 1H), 5.47 (t, <math>J = 2.0</math> Hz, 1H), 4.89 – 4.81 (m, 2H), 4.17 (dq, <math>J_1 = 7.0</math> Hz, <math>J_2 = 2.0</math> Hz, 1H), 3.60 – 3.56 (m, 2H), 2.61 – 2.56 (m, 1H), 2.37 – 2.31 (m, 1H), 1.29 (t, <math>J = 7.0</math> Hz, 3H) ppm.</p> <p><b><math>^{13}\text{C}</math> NMR</b> (126 MHz, <math>\text{CDCl}_3</math>): <math>\delta</math> 174.5, 174.0, 167.7, 141.5, 134.7, 130.6, 129.0, 128.90, 128.7, 128.0, 127.2, 124.7, 110.7, 92.3, 85.1, 59.4, 43.9, 33.5, 30.1, 14.5 ppm.</p> <p><b>HRMS (ESI-MS)</b> calcd for <math>\text{C}_{22}\text{H}_{20}\text{ClNO}_4\text{Na}^+</math> 420.09786; Found: 420.09720.</p> |
|-------------------------------------------------------------------------------------|------------------------------------------------------------------------------------------------------------------------------------------------------------------------------------------------------------------------------------------------------------------------------------------------------------------------------------------------------------------------------------------------------------------------------------------------------------------------------------------------------------------------------------------------------------------------------------------------------------------------------------------------------------------------------------------------------------------------------------------------------------------------------------------------------------------------------------------------------------------------------------------------------------------------------------------------------------------------------------------------------------------------------------------------------------------|

**(E)-Ethyl 2-(5'-chloro-2'-oxo-1'-(prop-2-ynyl)-3H-spiro[furan-2,3'-indoline]-5(4H)-ylidene)acetate (20)**

|                                                                                   |                                                                                                                                                                                                                                                                                                                                                                                                                                                                                                                                                                                                                                                                                                                                                                                                                                                                                                                                                                                                                                                                                                                                                      |
|-----------------------------------------------------------------------------------|------------------------------------------------------------------------------------------------------------------------------------------------------------------------------------------------------------------------------------------------------------------------------------------------------------------------------------------------------------------------------------------------------------------------------------------------------------------------------------------------------------------------------------------------------------------------------------------------------------------------------------------------------------------------------------------------------------------------------------------------------------------------------------------------------------------------------------------------------------------------------------------------------------------------------------------------------------------------------------------------------------------------------------------------------------------------------------------------------------------------------------------------------|
| 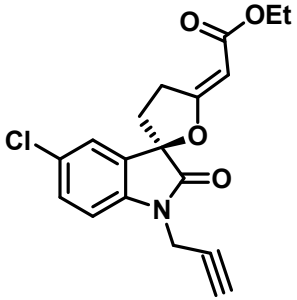 | <p>Yield: 61 mg (35%), colourless oil.</p> <p><b>IR</b> (film) <math>\nu_{\max}</math>: 1731, 1703, 1649, 1262, 1115 <math>\text{cm}^{-1}</math>.</p> <p><b><math>^1\text{H NMR}</math></b> (500 MHz, <math>\text{CDCl}_3</math>): <math>\delta</math> 7.37 (dd, <math>J_1 = 8.3</math> Hz, <math>J_2 = 2.5</math> Hz, 1H), 7.31 (d, <math>J = 2.0</math> Hz, 1H), 7.01 (d, <math>J = 8.5</math> Hz, 1H), 5.44 (t, <math>J = 1.5</math> Hz, 1H), 4.54 (dd, <math>J_1 = 18.0</math> Hz, <math>J_2 = 2.5</math> Hz, 1H), 4.37 (dd, <math>J_1 = 17.5</math> Hz, <math>J_2 = 2.5</math> Hz, 1H), 4.16 (dq, <math>J_1 = 7.0</math> Hz, <math>J_2 = 1.0</math> Hz, 2H), 3.56 – 3.52 (m, 2H), 2.57 – 2.52 (m, 1H), 2.34 – 2.27 (m, 2H), 1.29 (t, <math>J = 7.0</math> Hz, 3H) ppm.</p> <p><b><math>^{13}\text{C NMR}</math></b> (126 MHz, <math>\text{CDCl}_3</math>): <math>\delta</math> 174.3, 172.9, 167.7, 140.5, 130.7, 129.3, 128.5, 124.7, 110.8, 92.4, 85.0, 75.9, 73.3, 59.5, 33.4, 30.00, 29.5, 14.5 ppm.</p> <p><b>HRMS (ESI-MS)</b> calcd for <math>\text{C}_{18}\text{H}_{16}\text{ClNO}_4\text{Na}^+</math> 368.06656; Found: 368.06601.</p> |
|-----------------------------------------------------------------------------------|------------------------------------------------------------------------------------------------------------------------------------------------------------------------------------------------------------------------------------------------------------------------------------------------------------------------------------------------------------------------------------------------------------------------------------------------------------------------------------------------------------------------------------------------------------------------------------------------------------------------------------------------------------------------------------------------------------------------------------------------------------------------------------------------------------------------------------------------------------------------------------------------------------------------------------------------------------------------------------------------------------------------------------------------------------------------------------------------------------------------------------------------------|

**(E)-Tert-butyl 2-(5'-chloro-2'-oxo-1'-(prop-2-ynyl)-3H-spiro[furan-2,3'-indoline]-5(4H)-ylidene)acetate (21)**

|                                                                                    |                                                                                                                                                                                                                                                                                                                                                                                                                                                                                                                                                                                                                                                                                                                                                                                                                                                                                                                                                                                                                                                   |
|------------------------------------------------------------------------------------|---------------------------------------------------------------------------------------------------------------------------------------------------------------------------------------------------------------------------------------------------------------------------------------------------------------------------------------------------------------------------------------------------------------------------------------------------------------------------------------------------------------------------------------------------------------------------------------------------------------------------------------------------------------------------------------------------------------------------------------------------------------------------------------------------------------------------------------------------------------------------------------------------------------------------------------------------------------------------------------------------------------------------------------------------|
| 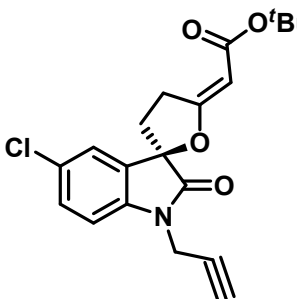 | <p>Yield: 60 mg (32%), colourless oil.</p> <p><b>IR</b> (film) <math>\nu_{\max}</math>: 1732, 1699, 1649, 1255, 1111 <math>\text{cm}^{-1}</math>.</p> <p><b><math>^1\text{H NMR}</math></b> (500 MHz, <math>\text{CDCl}_3</math>): <math>\delta</math> 7.36 (dd, <math>J_1 = 8.5</math> Hz, <math>J_2 = 2.0</math> Hz, 1H), 7.29 (d, <math>J = 2.0</math> Hz, 1H), 7.01 (d, <math>J = 8.5</math> Hz, 1H), 5.36 (t, <math>J = 1.5</math> Hz, 1H), 4.54 (dd, <math>J_1 = 17.5</math> Hz, <math>J_2 = 2.5</math> Hz, 1H), 4.36 (dd, <math>J_1 = 17.5</math> Hz, <math>J_2 = 2.5</math> Hz, 1H), 3.52 – 3.48 (m, 2H), 2.55 – 2.50 (m, 1H), 2.32 – 2.25 (m, 2H), 1.49 (s, 1H) ppm.</p> <p><b><math>^{13}\text{C NMR}</math></b> (126 MHz, <math>\text{CDCl}_3</math>): <math>\delta</math> 173.2, 173.0, 167.1, 140.4, 130.6, 129.3, 128.8, 124.6, 110.8, 94.1, 84.7, 79.3, 75.9, 73.3, 33.5, 29.7, 29.5, 28.4.</p> <p><b>HRMS (ESI-MS)</b> calcd for <math>\text{C}_{20}\text{H}_{20}\text{ClNO}_4\text{Na}^+</math> 396.09786; Found: 396.09694.</p> |
|------------------------------------------------------------------------------------|---------------------------------------------------------------------------------------------------------------------------------------------------------------------------------------------------------------------------------------------------------------------------------------------------------------------------------------------------------------------------------------------------------------------------------------------------------------------------------------------------------------------------------------------------------------------------------------------------------------------------------------------------------------------------------------------------------------------------------------------------------------------------------------------------------------------------------------------------------------------------------------------------------------------------------------------------------------------------------------------------------------------------------------------------|

**(E)-Ethyl 2-(1'-methyl-5'-nitro-2'-oxo-3H-spiro[furan-2,3'-indoline]-5(4H)-ylidene)acetate (22)**

|                                                                                     |                                                                                                                                                                                                                                                                                                                                                                                                                                                                                                                                                                                                                                                                                                                                                                                                                                                                                                                                                                 |
|-------------------------------------------------------------------------------------|-----------------------------------------------------------------------------------------------------------------------------------------------------------------------------------------------------------------------------------------------------------------------------------------------------------------------------------------------------------------------------------------------------------------------------------------------------------------------------------------------------------------------------------------------------------------------------------------------------------------------------------------------------------------------------------------------------------------------------------------------------------------------------------------------------------------------------------------------------------------------------------------------------------------------------------------------------------------|
| 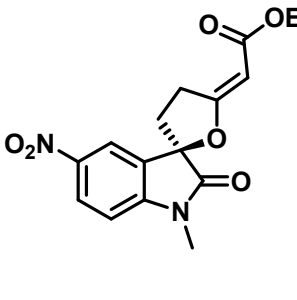 | <p>Yield: 80 mg (48%), colourless oil.</p> <p><b>IR</b> (film) <math>\nu_{\max}</math>: 1740, 1707, 1656, 1618, 1115, 1064 <math>\text{cm}^{-1}</math>.</p> <p><b><math>^1\text{H NMR}</math></b> (500 MHz, <math>\text{CDCl}_3</math>): <math>\delta</math> 8.34 (dd, <math>J_1 = 8.5</math> Hz, <math>J_2 = 1.5</math> Hz, 1H), 8.19 (d, <math>J = 1.0</math> Hz, 1H), 6.95 (d, <math>J = 9.0</math> Hz, 1H), 5.43 (s, 1H), 4.16 (q, <math>J = 7.0</math> Hz, 2H), 3.62 – 3.51 (m, 2H), 3.28 (s, 3H), 2.58 – 2.52 (m, 1H), 2.41 – 2.35 (m, 1H), 1.29 (t, <math>J = 7.0</math> Hz, 3H) ppm.</p> <p><b><math>^{13}\text{C NMR}</math></b> (126 MHz, <math>\text{CDCl}_3</math>): <math>\delta</math> 174.3, 173.8, 167.4, 149.3, 144.0, 127.9, 127.7, 120.1, 108.2, 92.7, 84.2, 59.5, 33.2, 29.9, 26.7, 14.5 ppm.</p> <p><b>HRMS (ESI-MS)</b> calcd for <math>\text{C}_{16}\text{H}_{16}\text{N}_2\text{O}_6\text{Na}^+</math> 355.09061; Found: 355.08923.</p> |
|-------------------------------------------------------------------------------------|-----------------------------------------------------------------------------------------------------------------------------------------------------------------------------------------------------------------------------------------------------------------------------------------------------------------------------------------------------------------------------------------------------------------------------------------------------------------------------------------------------------------------------------------------------------------------------------------------------------------------------------------------------------------------------------------------------------------------------------------------------------------------------------------------------------------------------------------------------------------------------------------------------------------------------------------------------------------|

## 4. $^1\text{H}$ and $^{13}\text{C}$ NMR spectra of compounds

### $^1\text{H}$ NMR (500 MHz, $\text{CDCl}_3$ ) of Compound 8

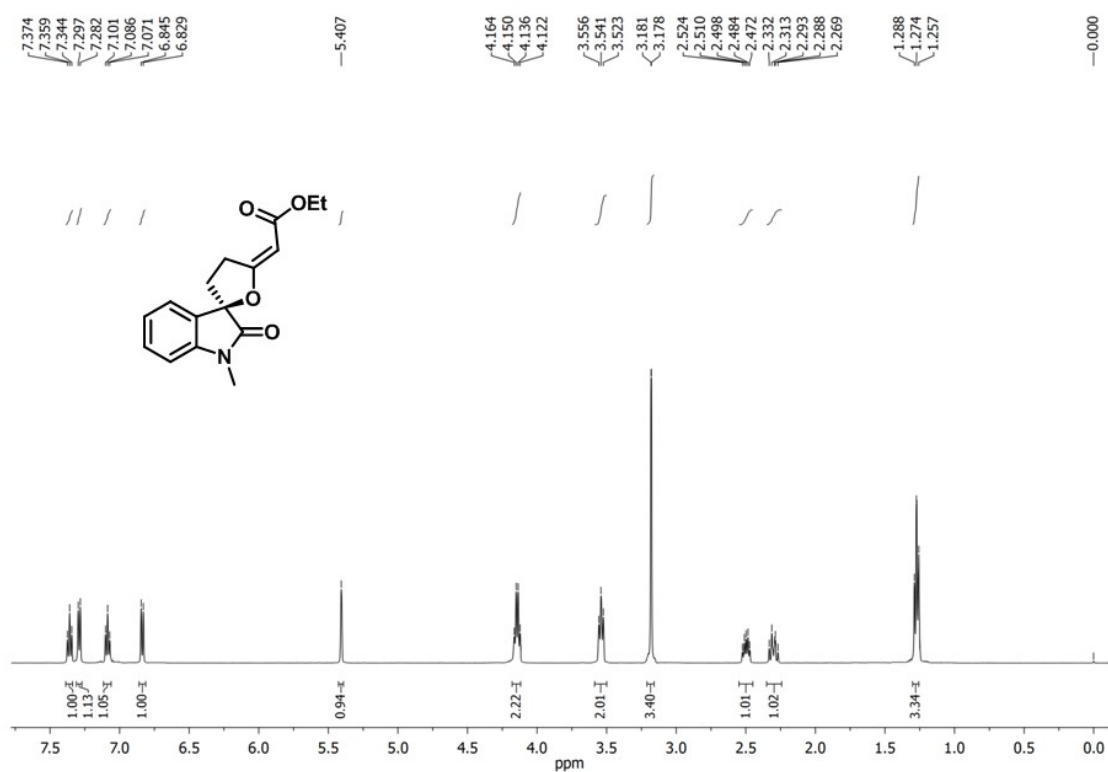

### $^{13}\text{C}$ NMR (126 MHz) of Compound 8

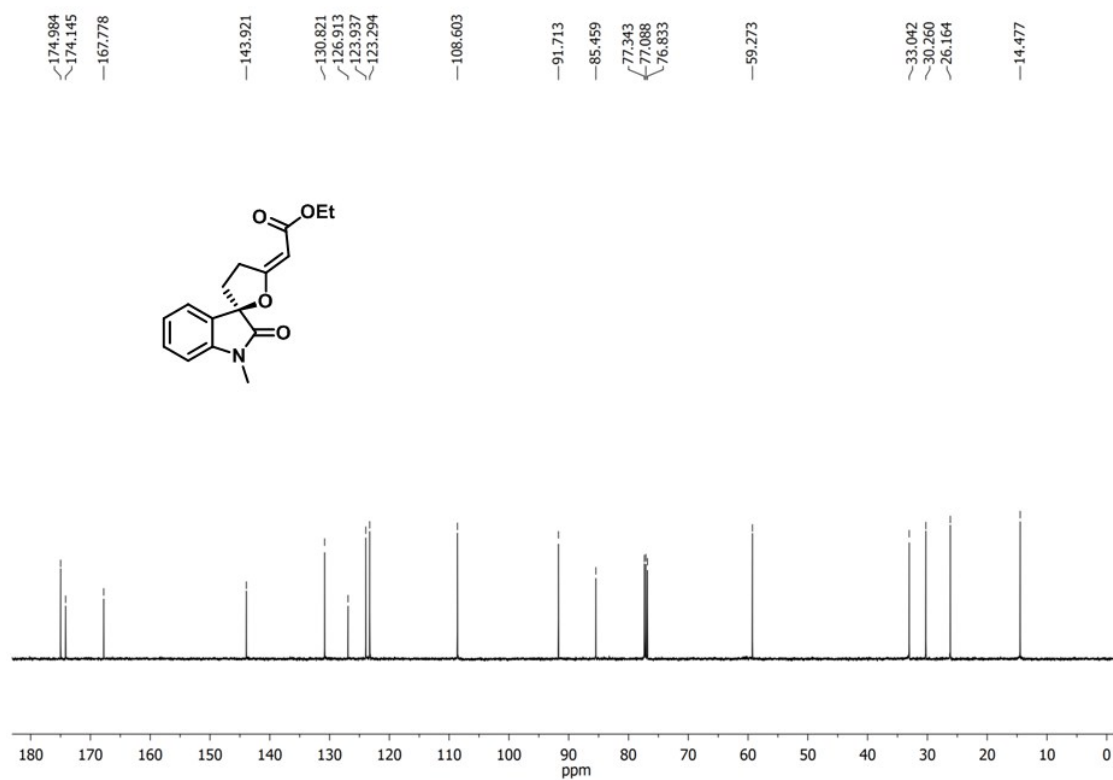

### <sup>1</sup>H NMR (500 MHz, CDCl<sub>3</sub>) of Compound 9

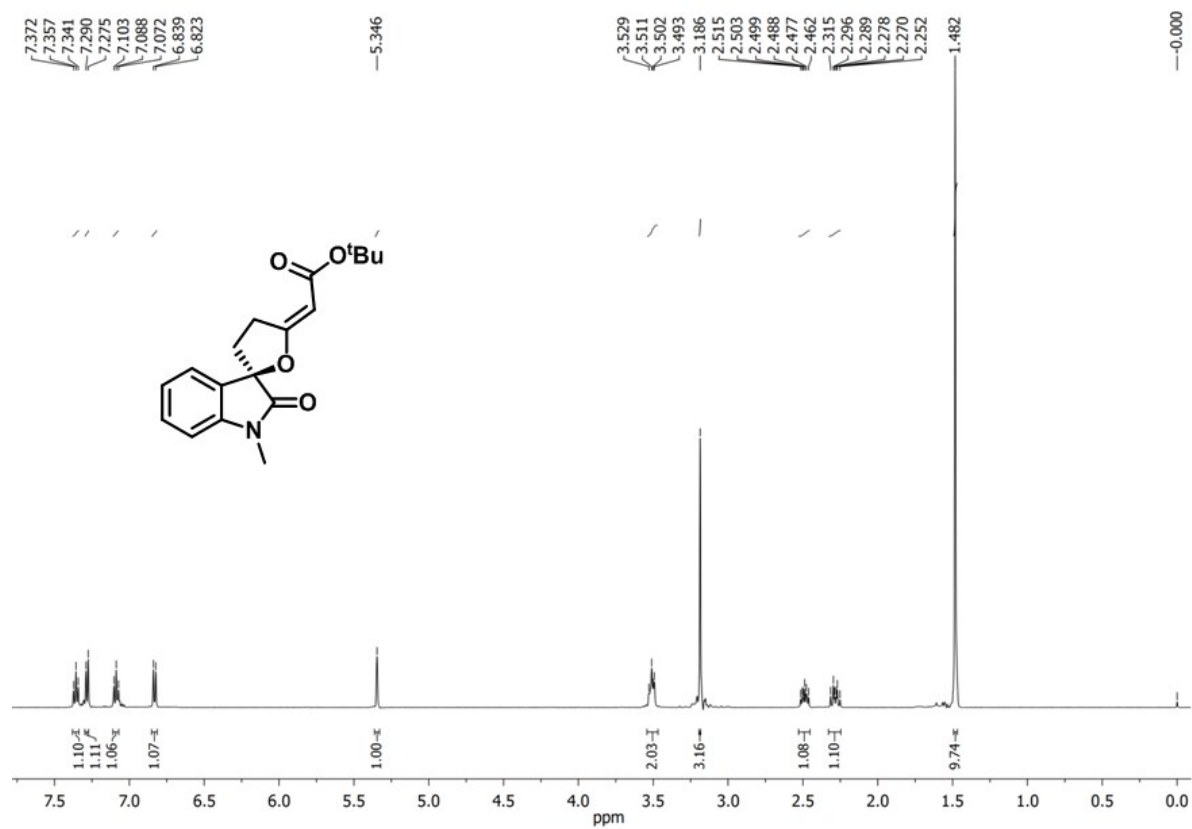

### <sup>13</sup>C NMR (126 MHz) of Compound 9

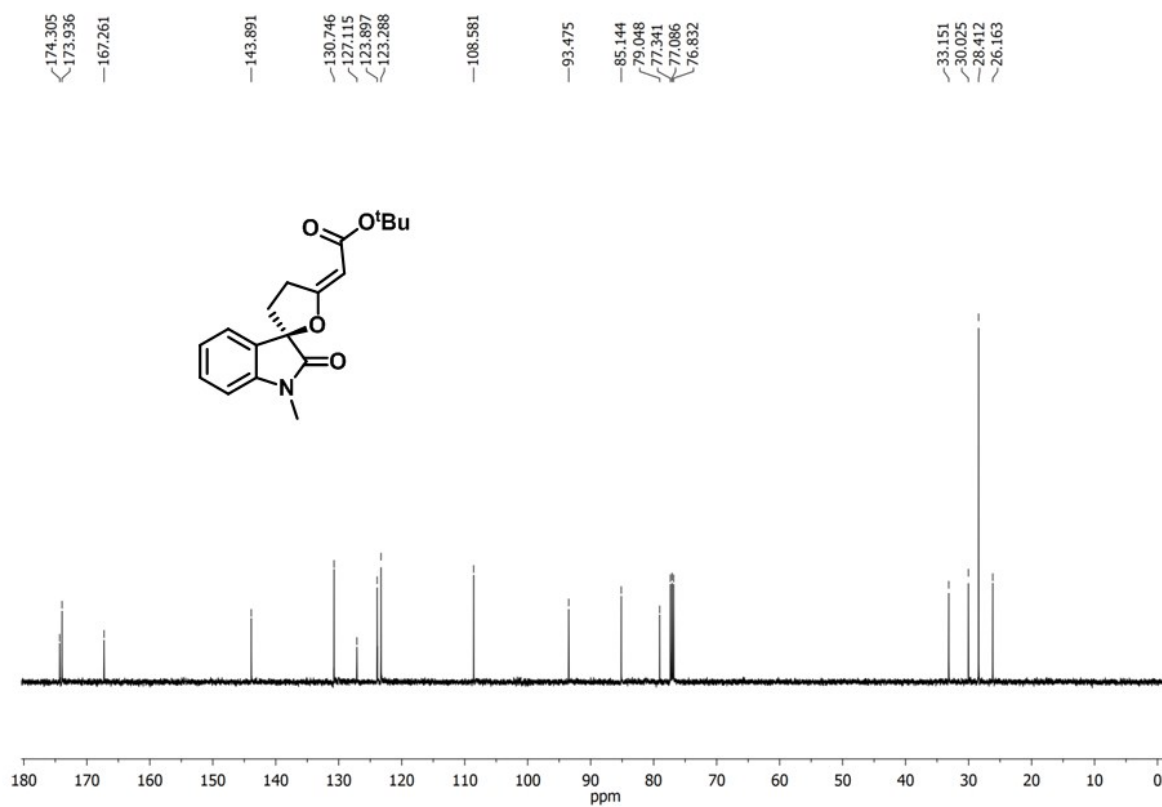



### <sup>1</sup>H NMR (500 MHz, CDCl<sub>3</sub>) of Compound 10

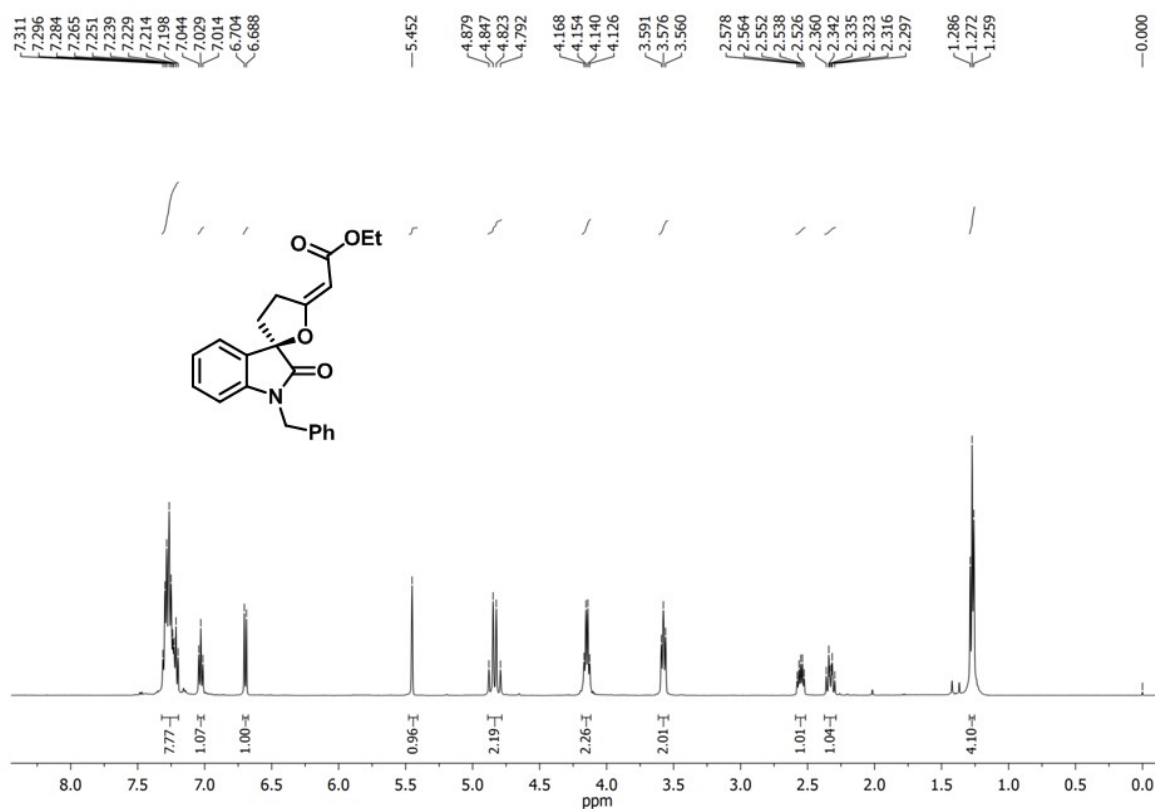

### <sup>13</sup>C NMR (126 MHz, CDCl<sub>3</sub>) of Compound 10

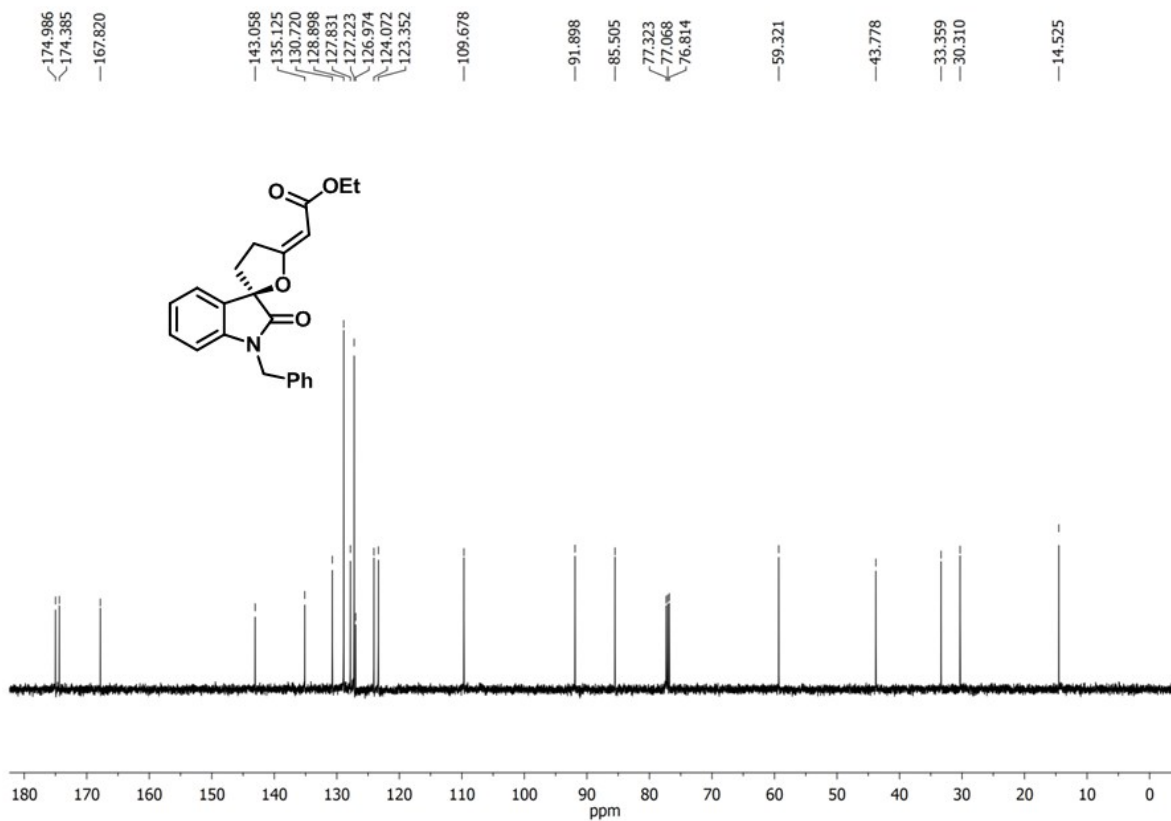

### $^1\text{H}$ NMR (500 MHz, $\text{CDCl}_3$ ) of Compound 11

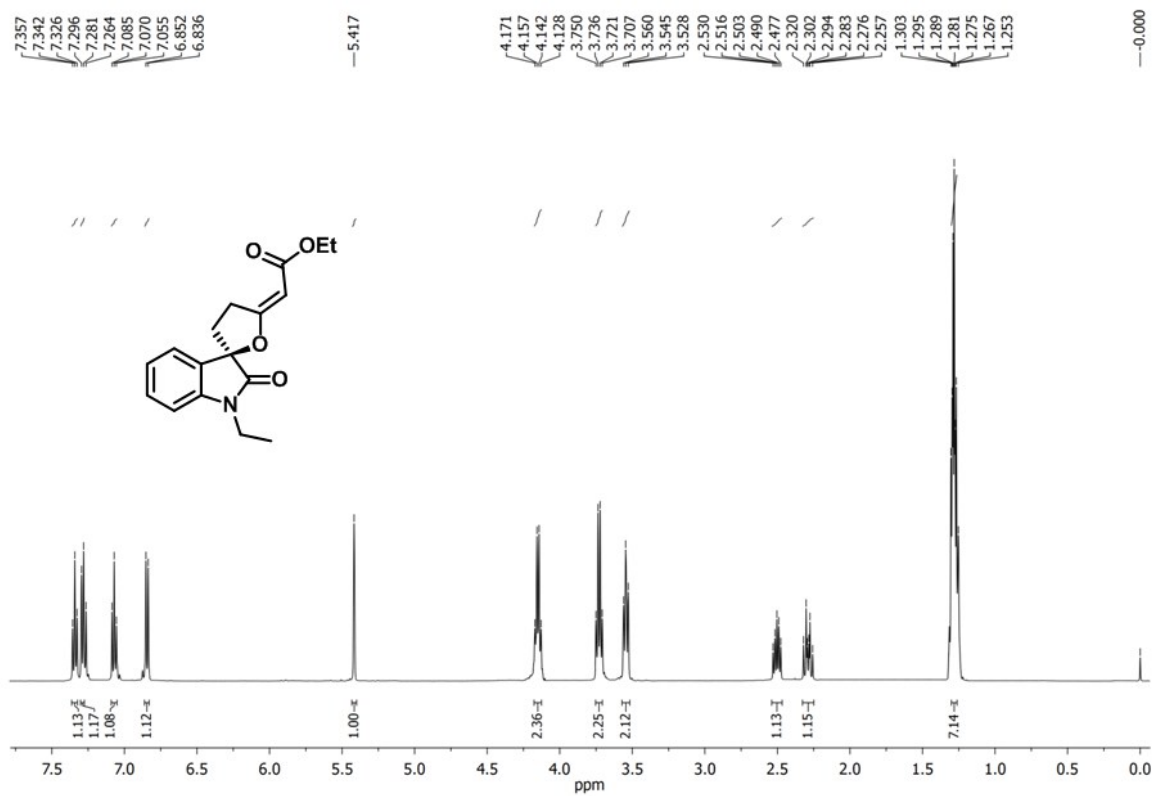

### $^{13}\text{C}$ NMR (126 MHz, $\text{CDCl}_3$ ) of Compound 11

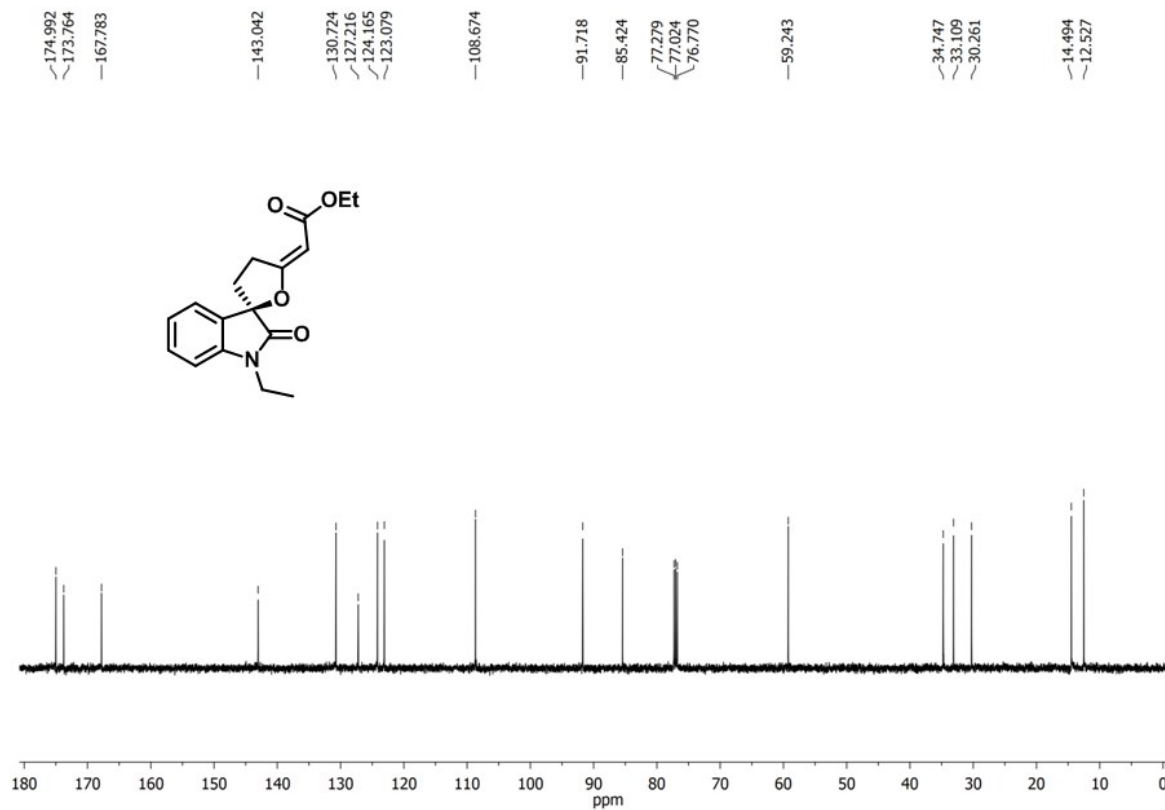

### <sup>1</sup>H NMR (500 MHz, CDCl<sub>3</sub>) of Compound 12

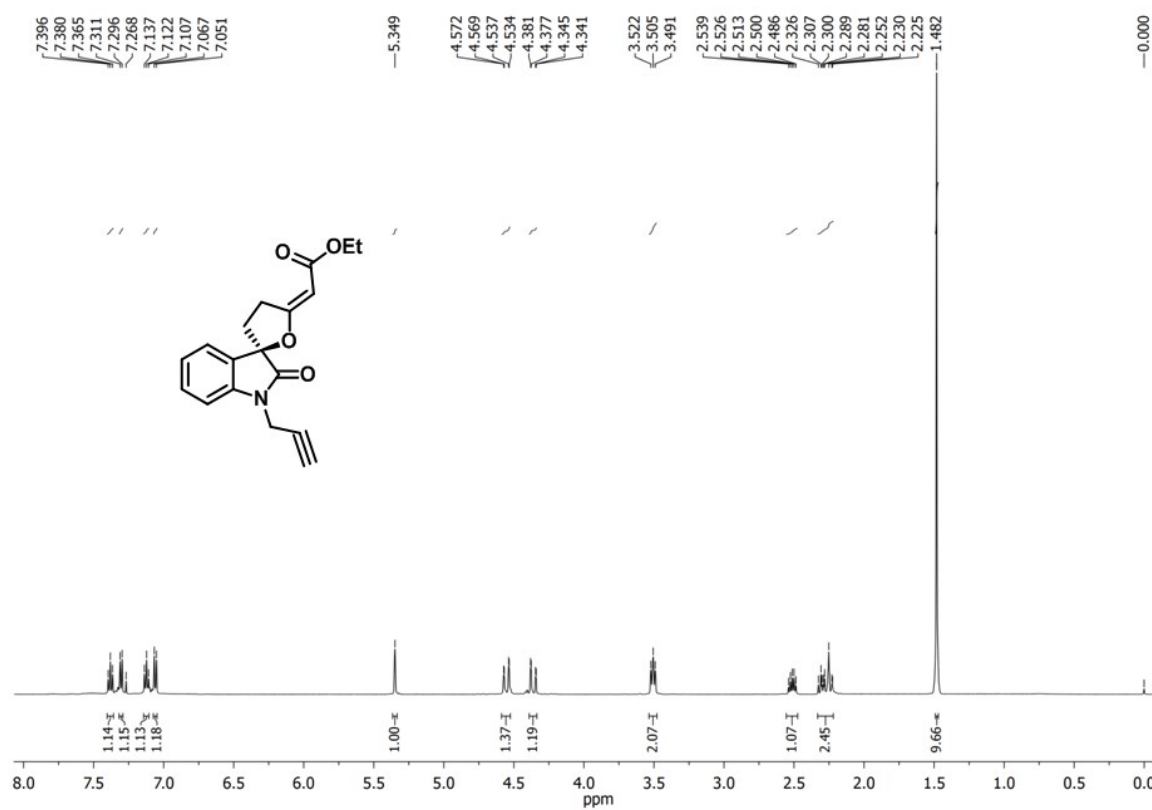

### <sup>13</sup>C NMR (126 MHz, CDCl<sub>3</sub>) of Compound 12

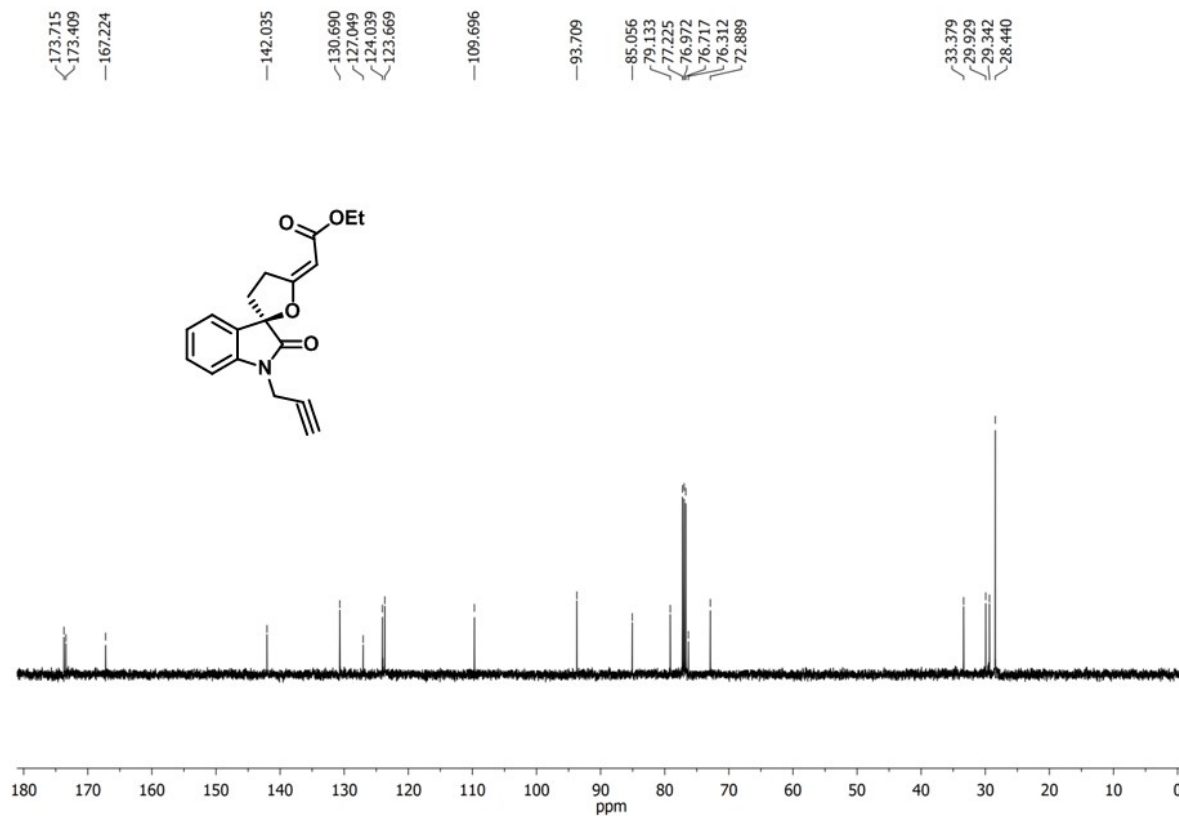

### $^1\text{H}$ NMR (500 MHz, $\text{CDCl}_3$ ) of Compound 13

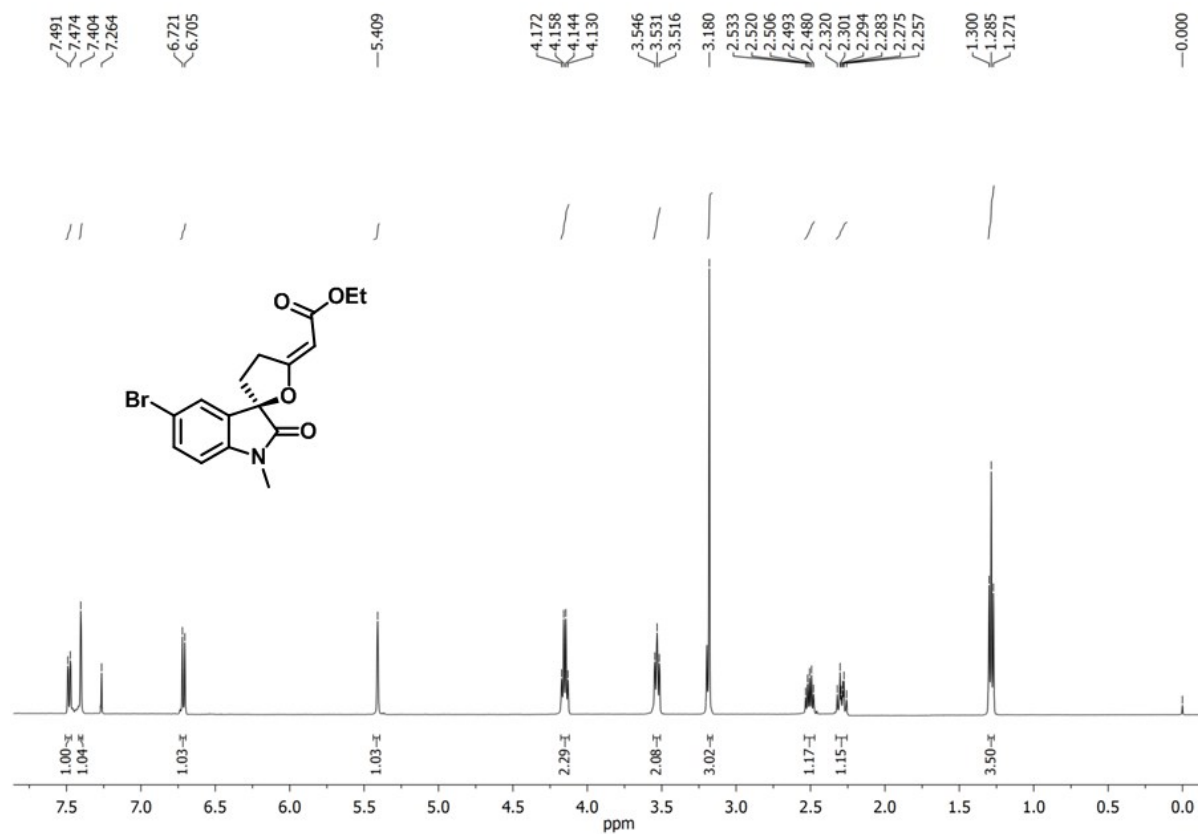

### $^{13}\text{C}$ NMR (126 MHz, $\text{CDCl}_3$ ) of Compound 13

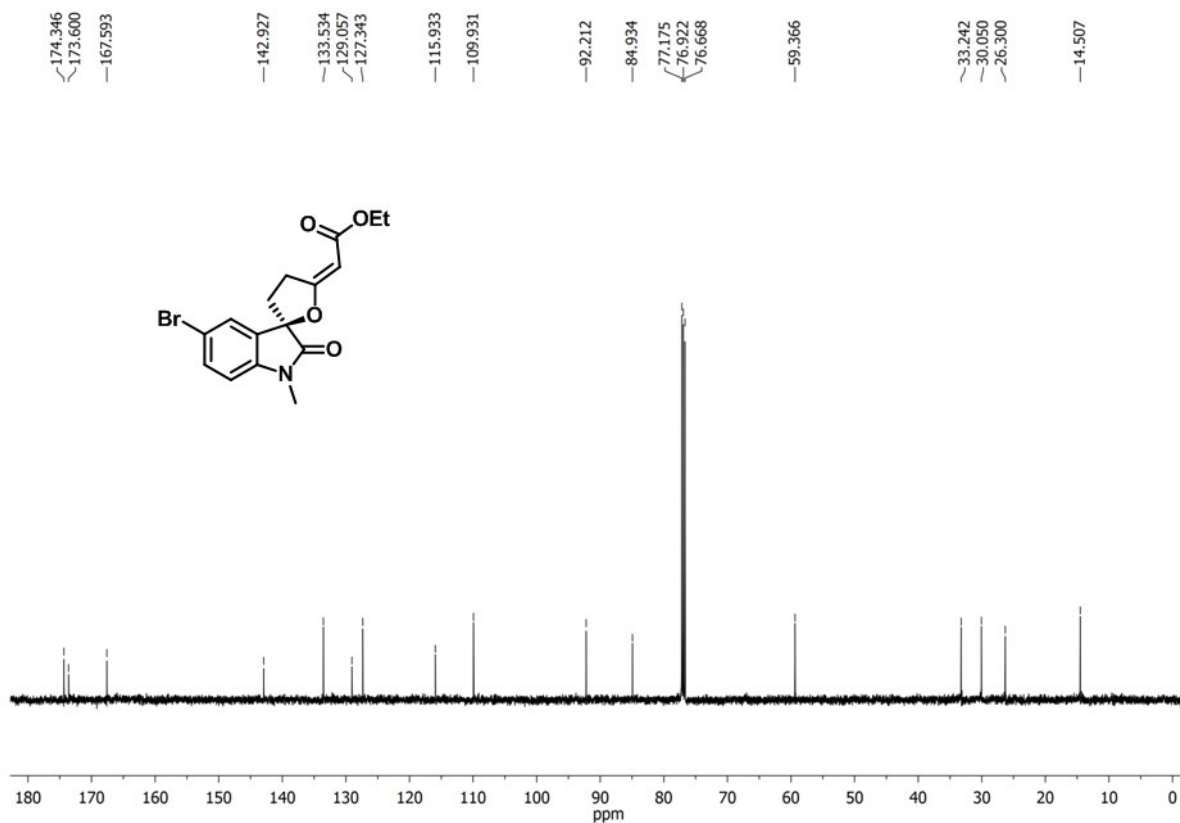

### $^1\text{H}$ NMR (500 MHz, $\text{CDCl}_3$ ) of Compound 14

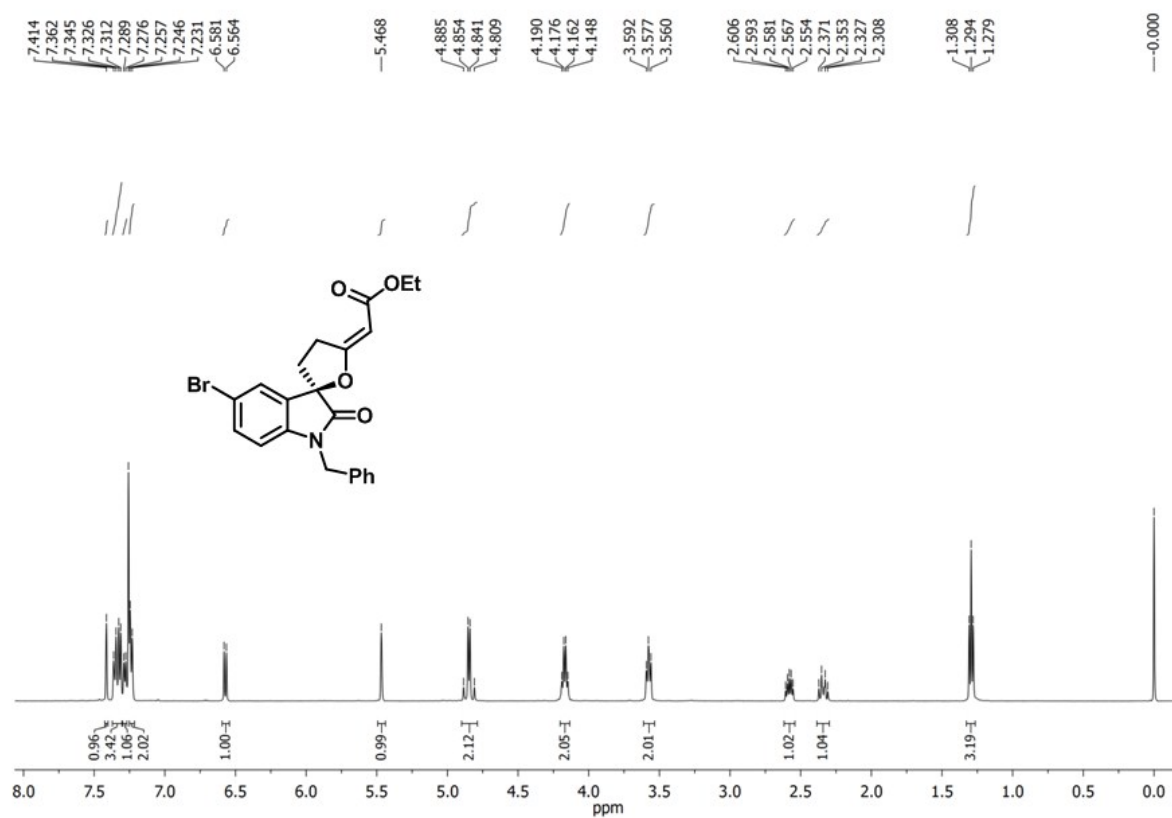

### $^{13}\text{C}$ NMR (126 MHz, $\text{CDCl}_3$ ) of Compound 14

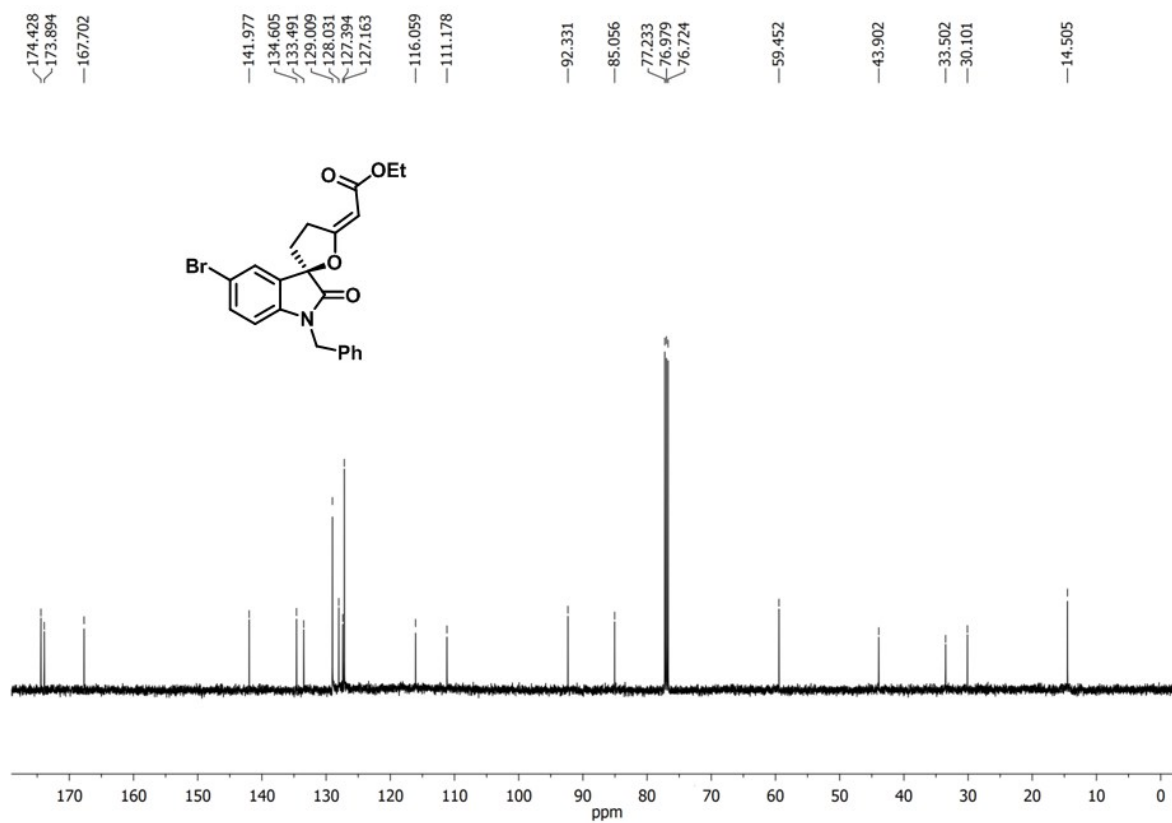

### $^1\text{H}$ NMR (500 MHz, $\text{CDCl}_3$ ) of Compound 15

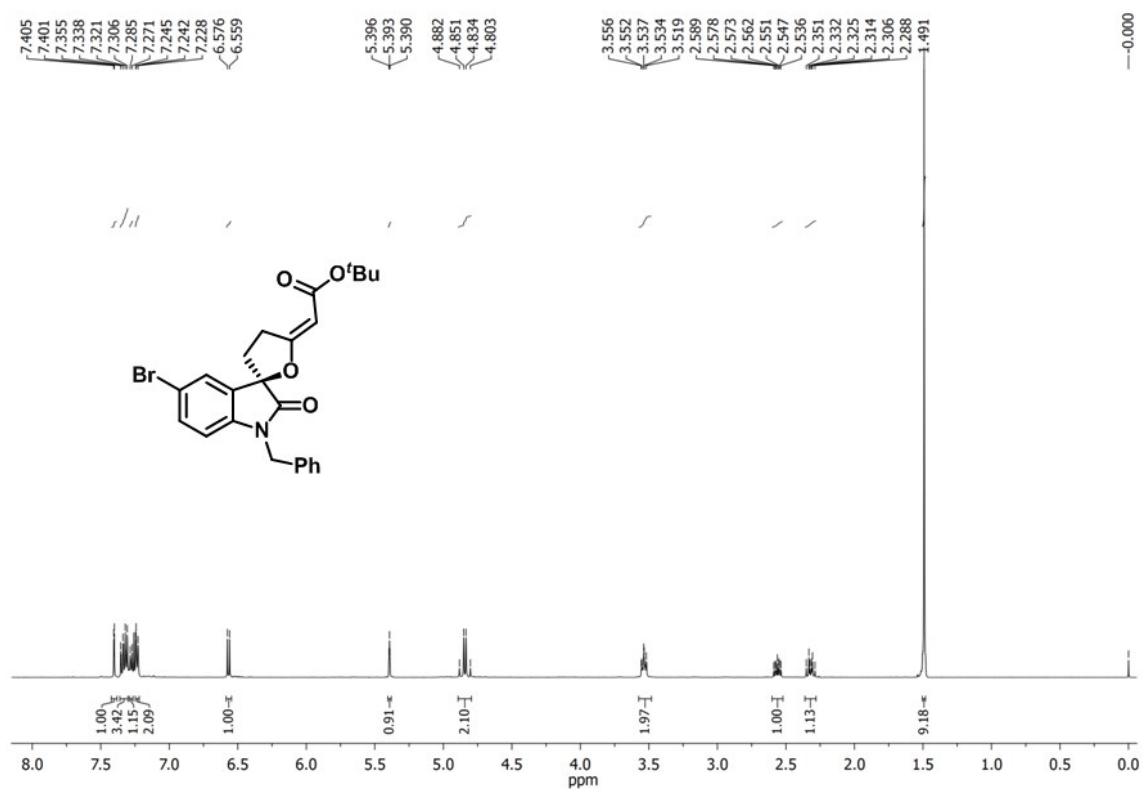

### $^{13}\text{C}$ NMR (126 MHz, $\text{CDCl}_3$ ) of Compound 15

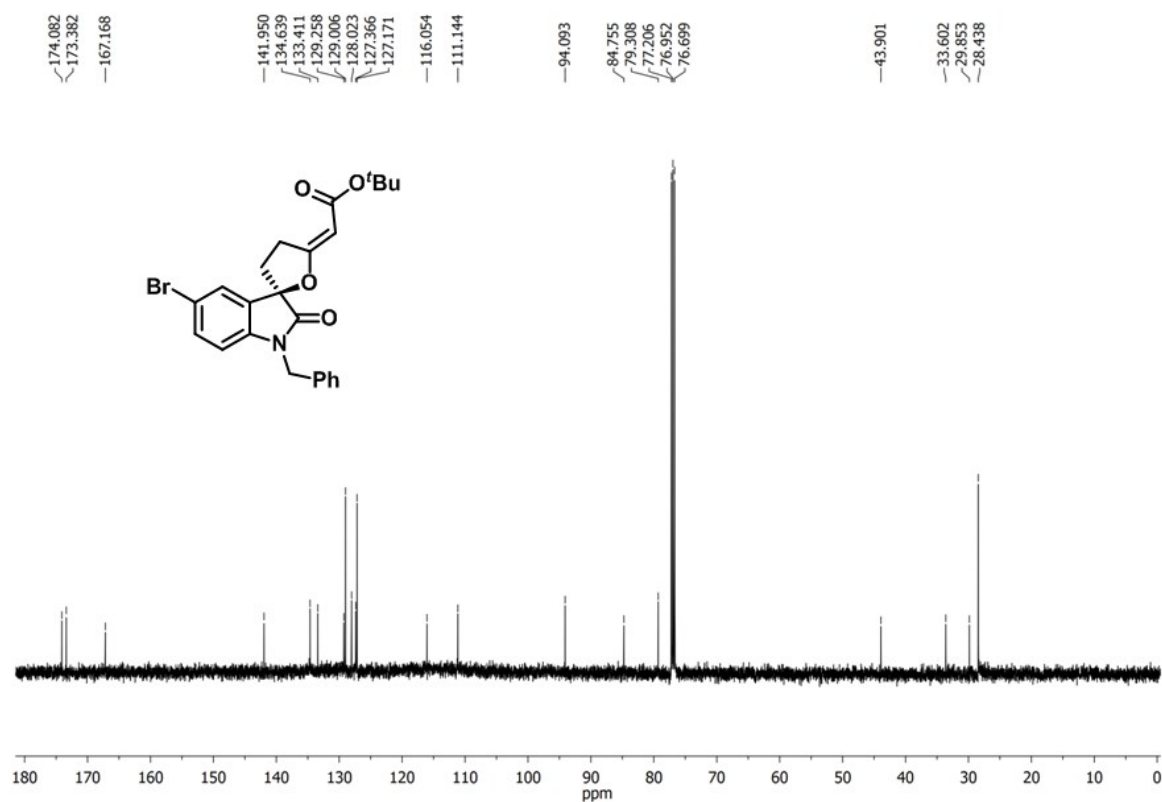

### $^1\text{H}$ NMR (500 MHz, $\text{CDCl}_3$ ) of Compound 16

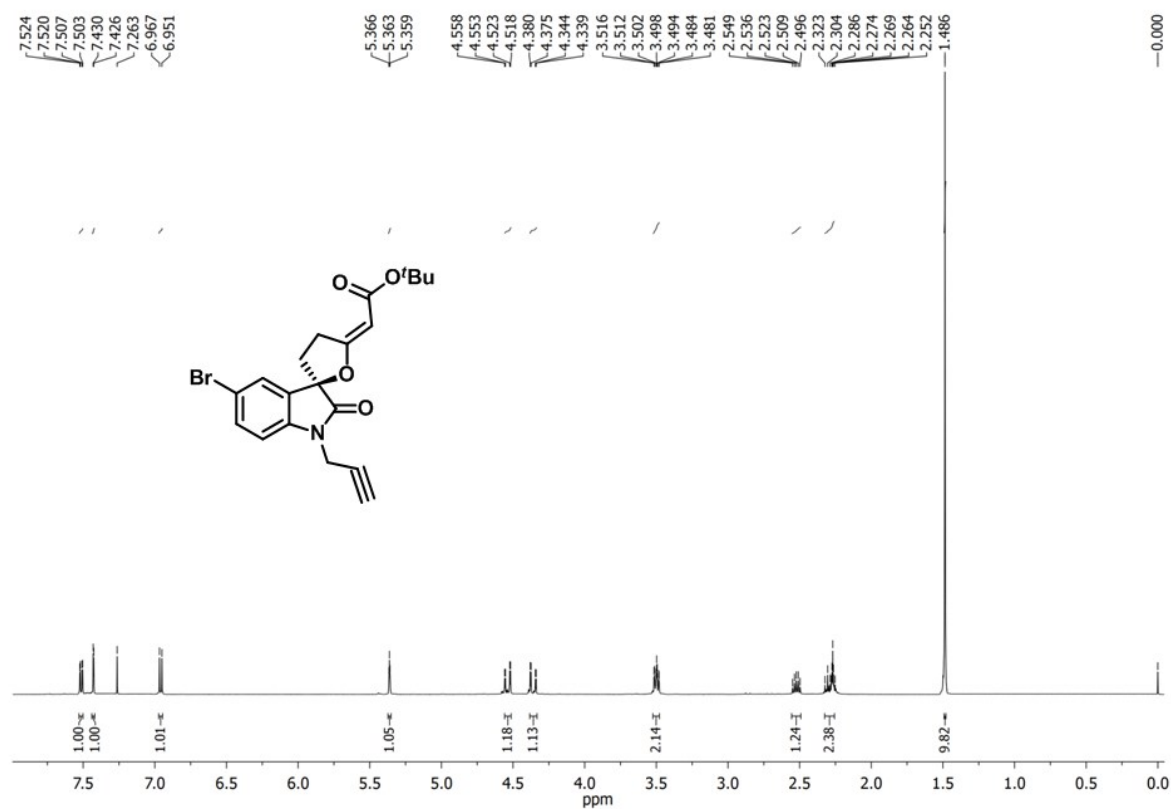

### $^{13}\text{C}$ NMR (126 MHz, $\text{CDCl}_3$ ) of Compound 16

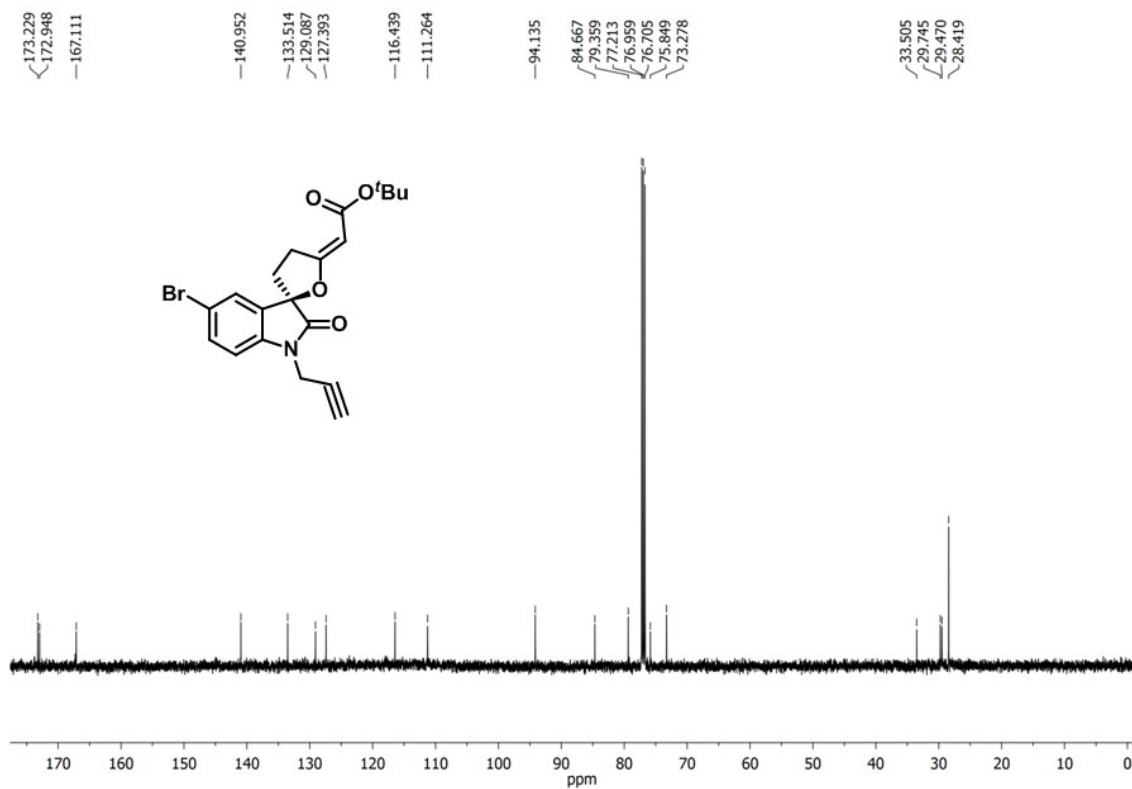

### $^1\text{H}$ NMR (500 MHz, $\text{CDCl}_3$ ) of Compound 17

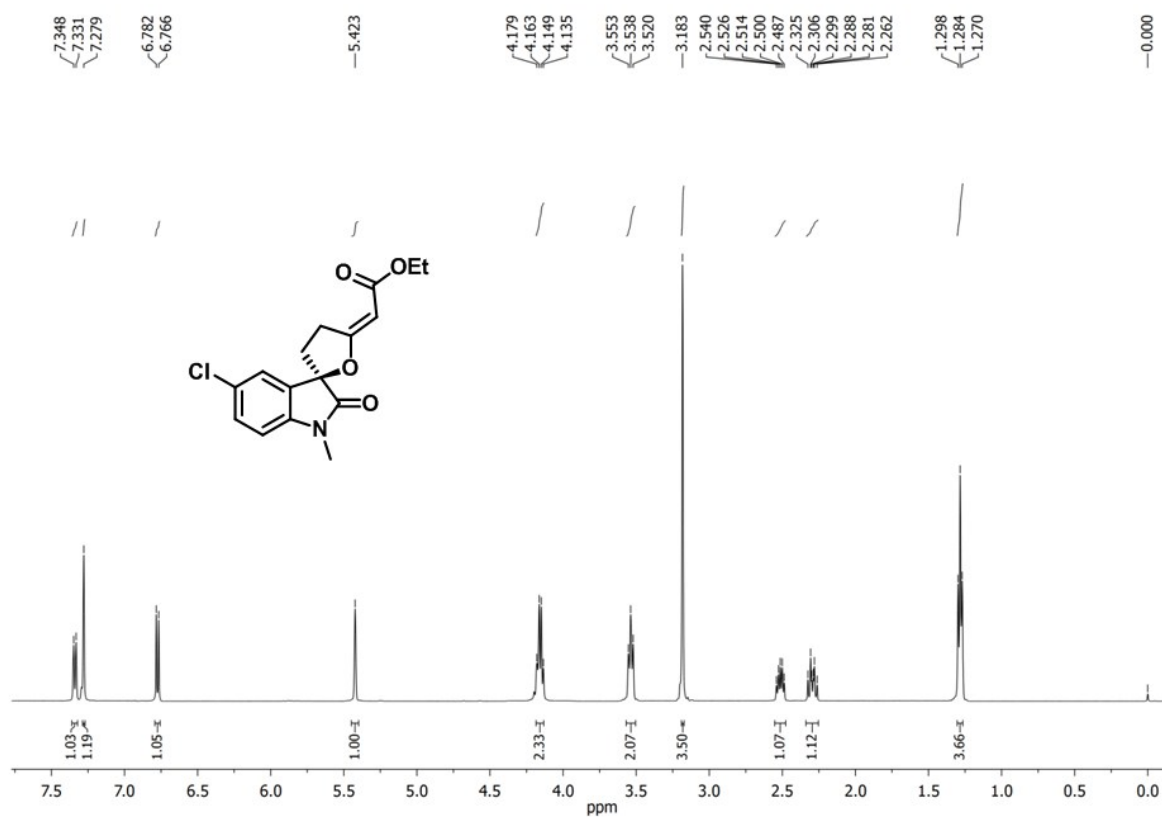

### $^{13}\text{C}$ NMR (126 MHz, $\text{CDCl}_3$ ) of Compound 17

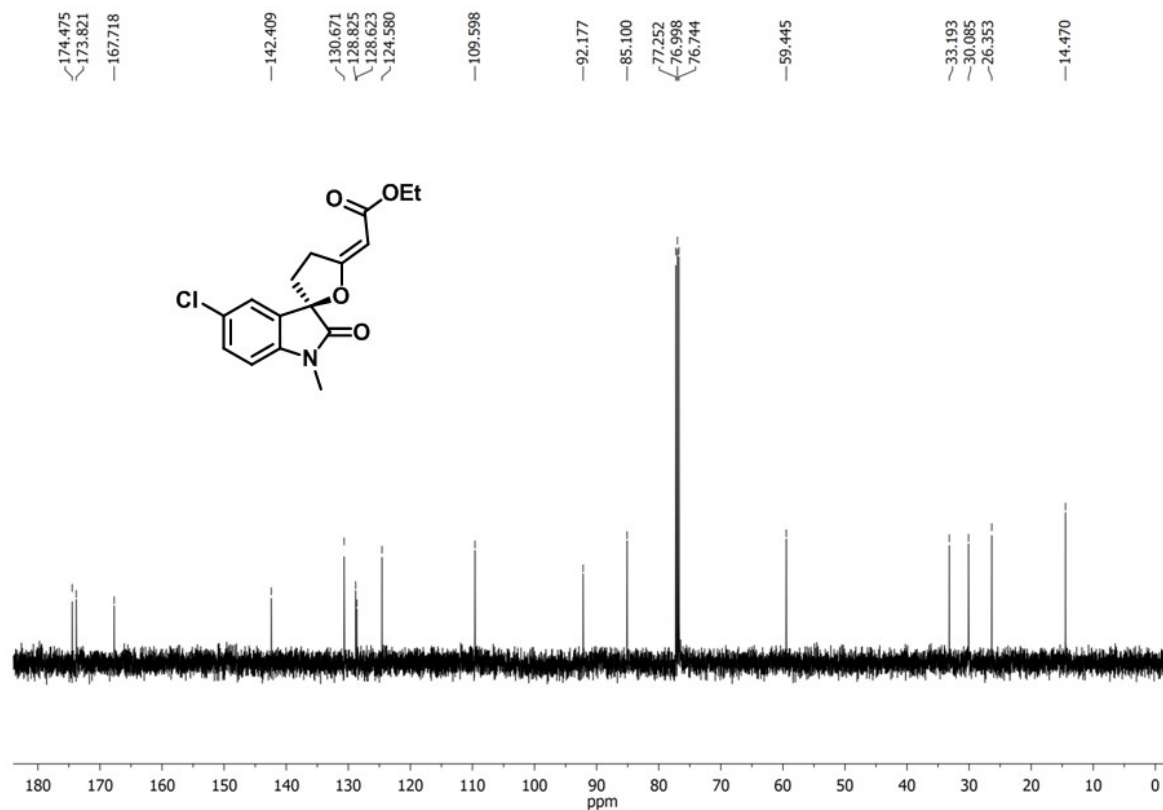



### $^1\text{H}$ NMR (500 MHz, $\text{CDCl}_3$ ) of Compound 18

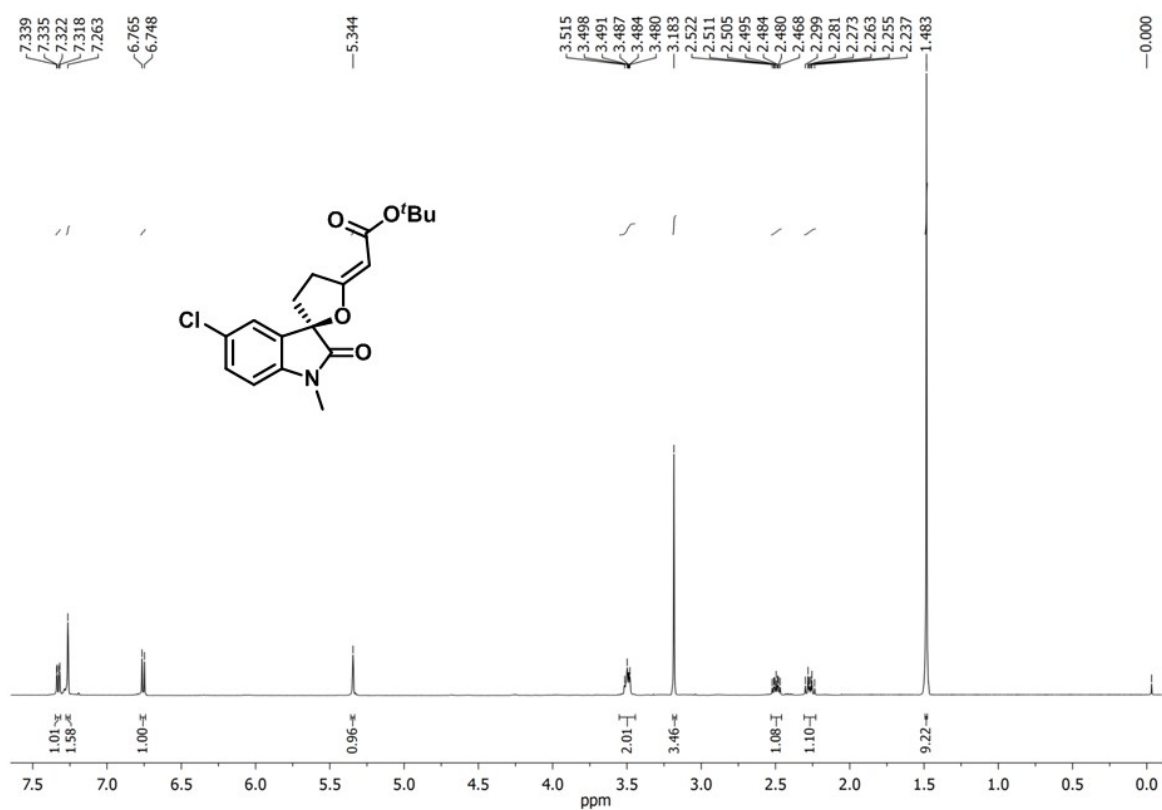

### $^{13}\text{C}$ NMR (126 MHz, $\text{CDCl}_3$ ) of Compound 18

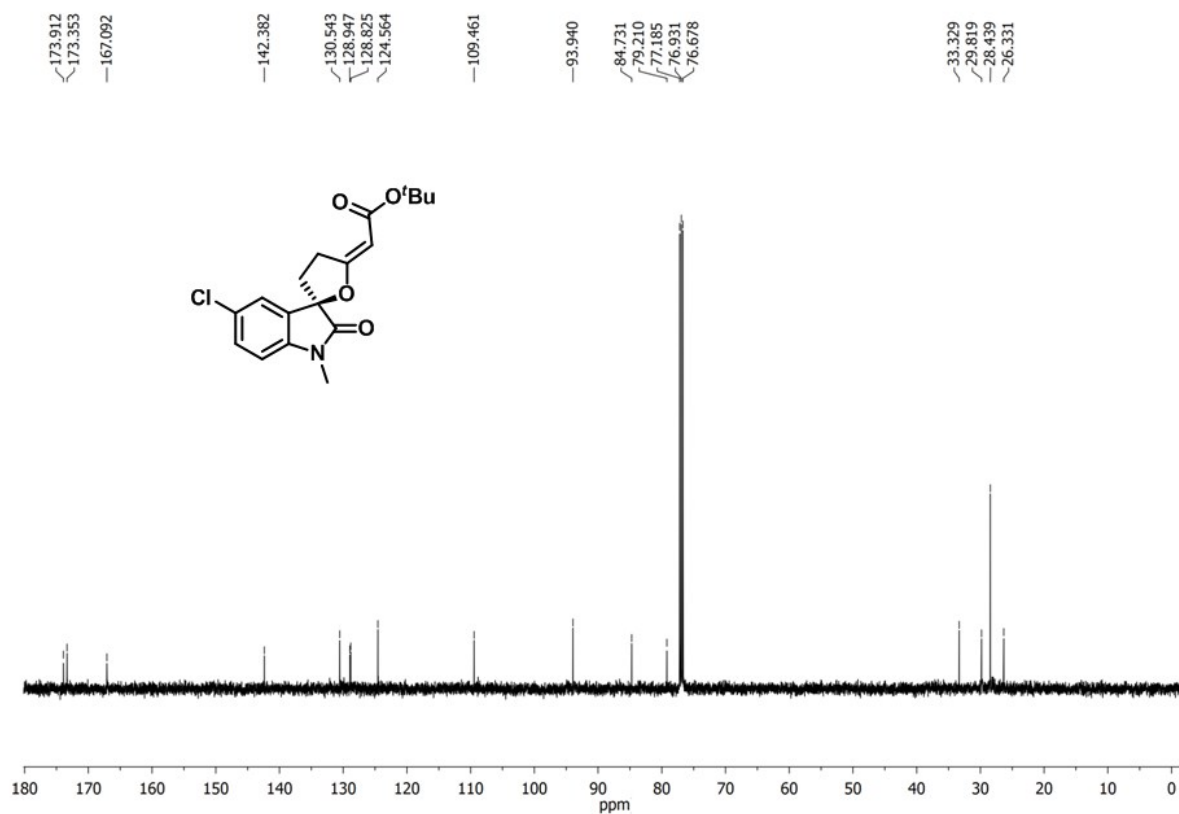

### $^1\text{H}$ NMR (500 MHz, $\text{CDCl}_3$ ) of Compound 19

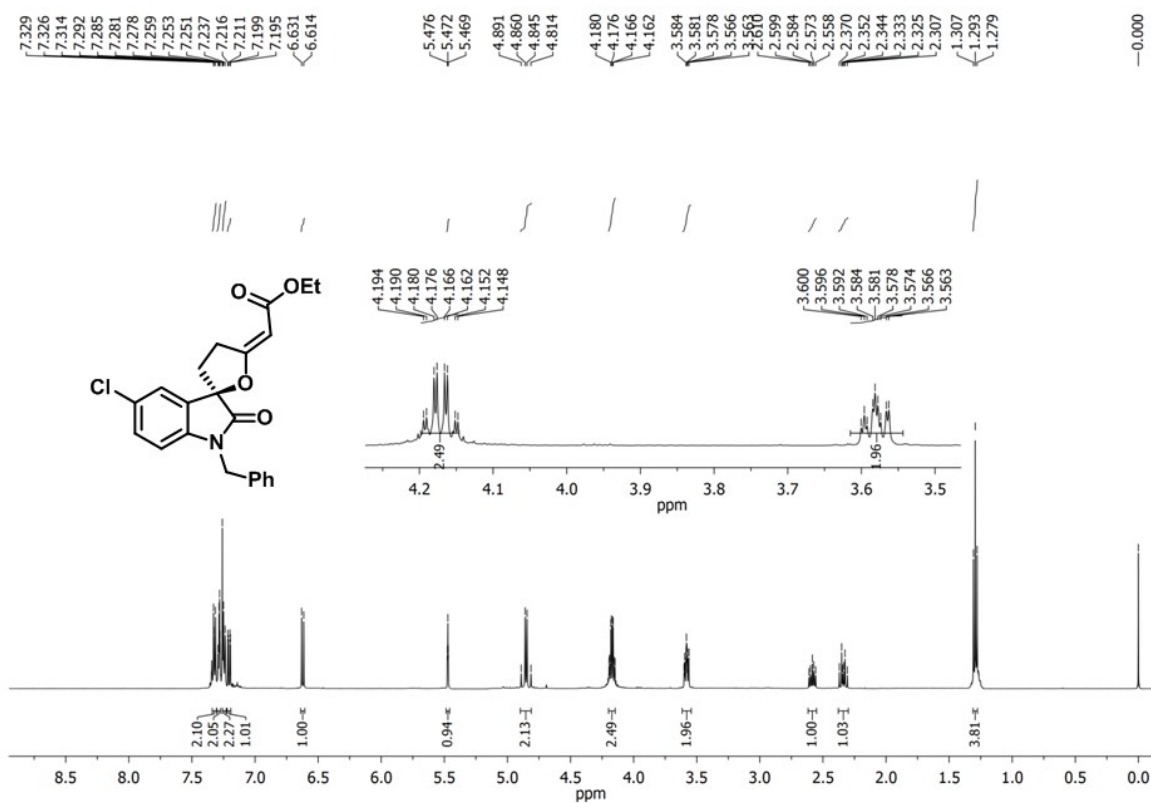

### $^{13}\text{C}$ NMR (126 MHz, $\text{CDCl}_3$ ) of Compound 19

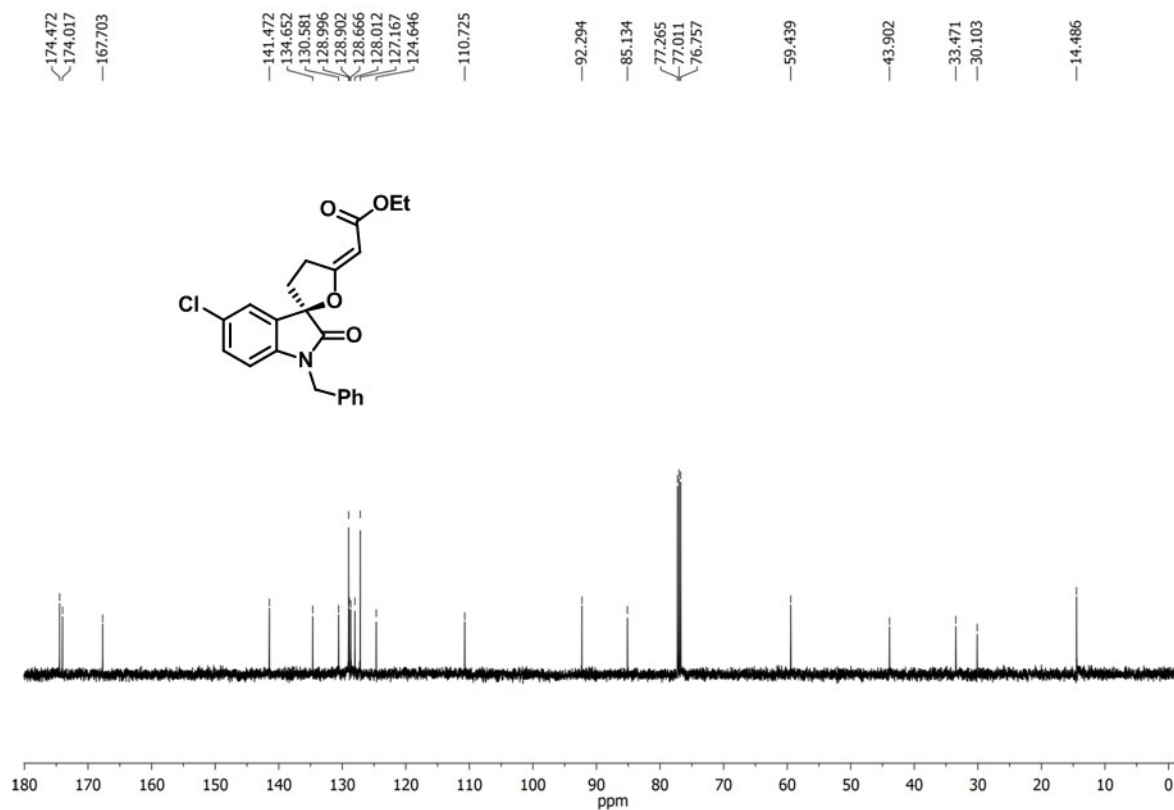

### <sup>1</sup>H NMR (500 MHz, CDCl<sub>3</sub>) of Compound 20

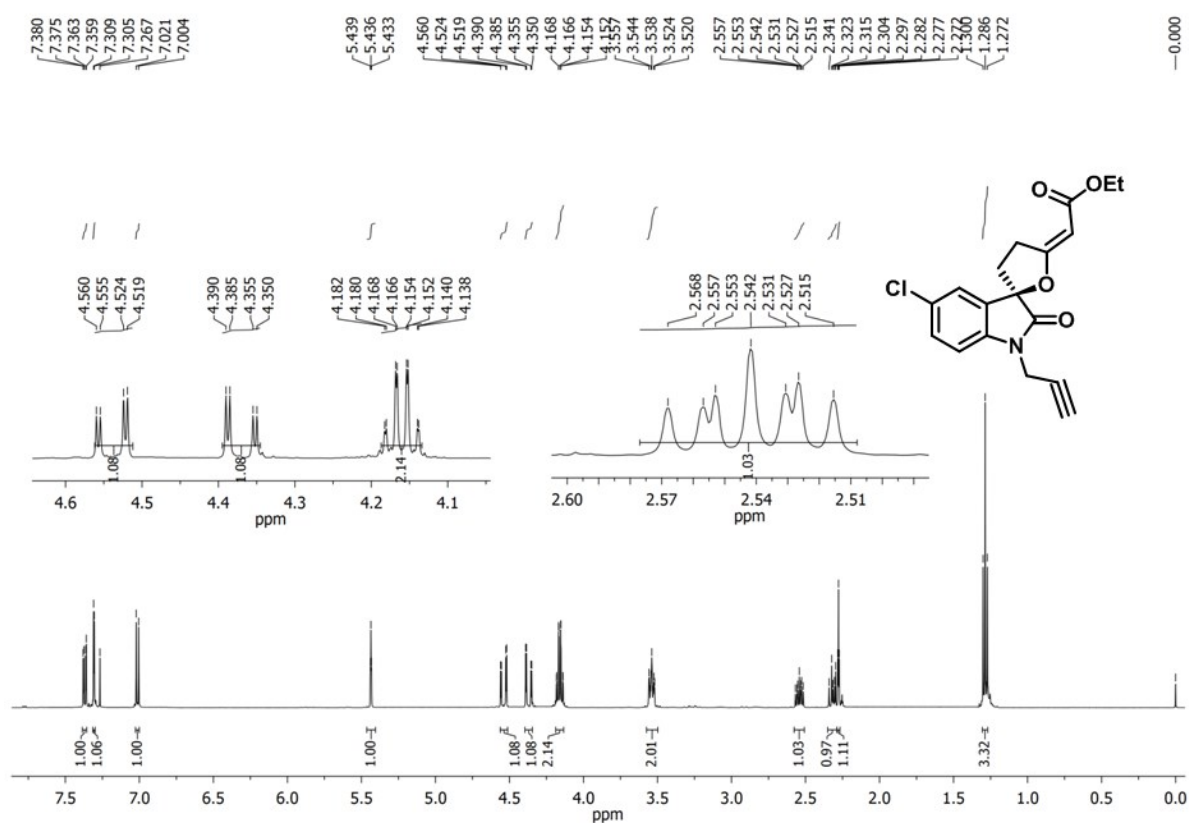

### <sup>13</sup>C NMR (126 MHz, CDCl<sub>3</sub>) of Compound 20

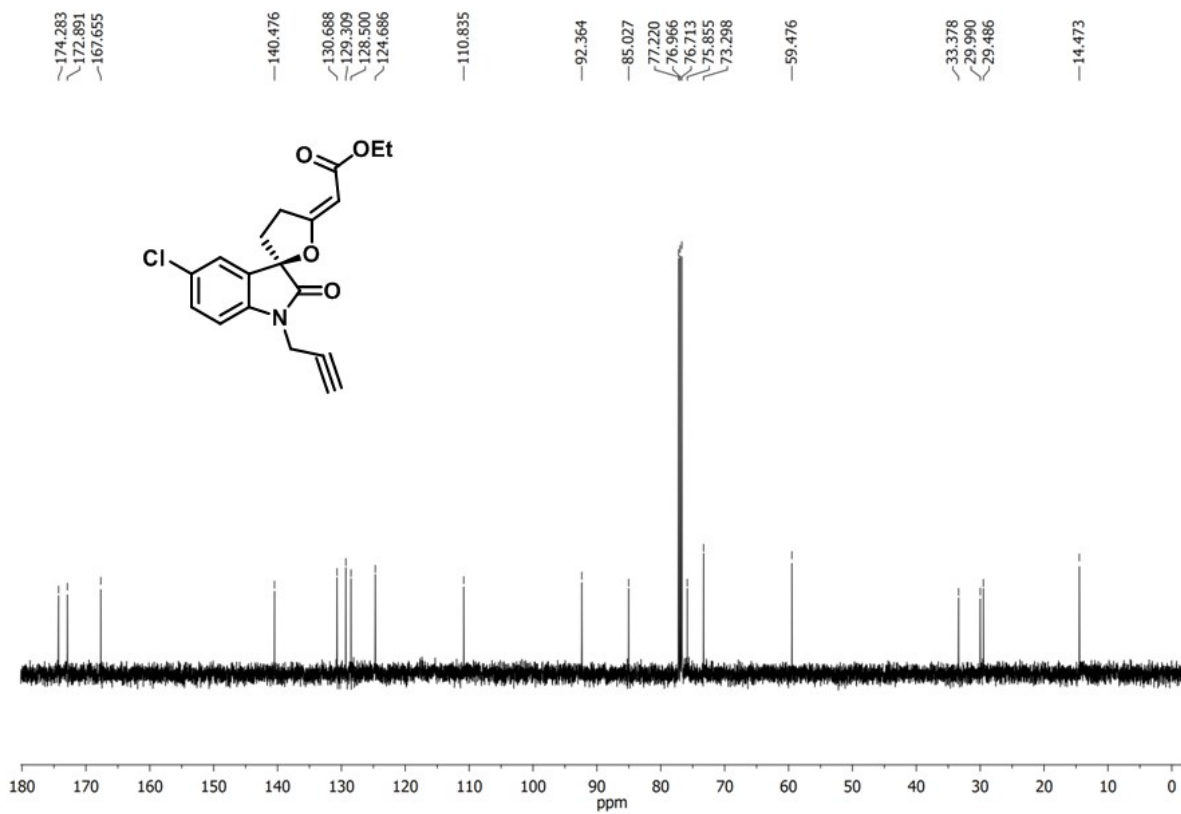

### $^1\text{H}$ NMR (500 MHz, $\text{CDCl}_3$ ) of Compound 21

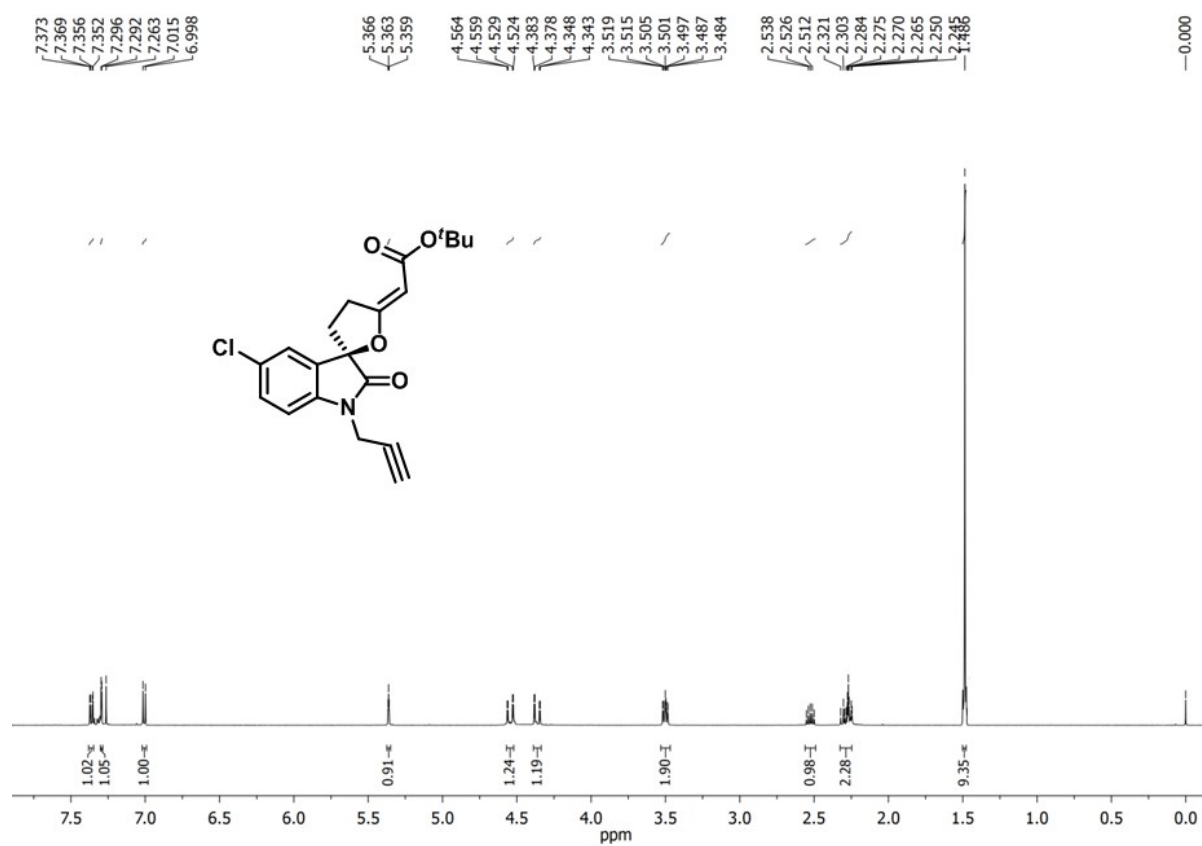

### $^{13}\text{C}$ NMR (126 MHz, $\text{CDCl}_3$ ) of Compound 21

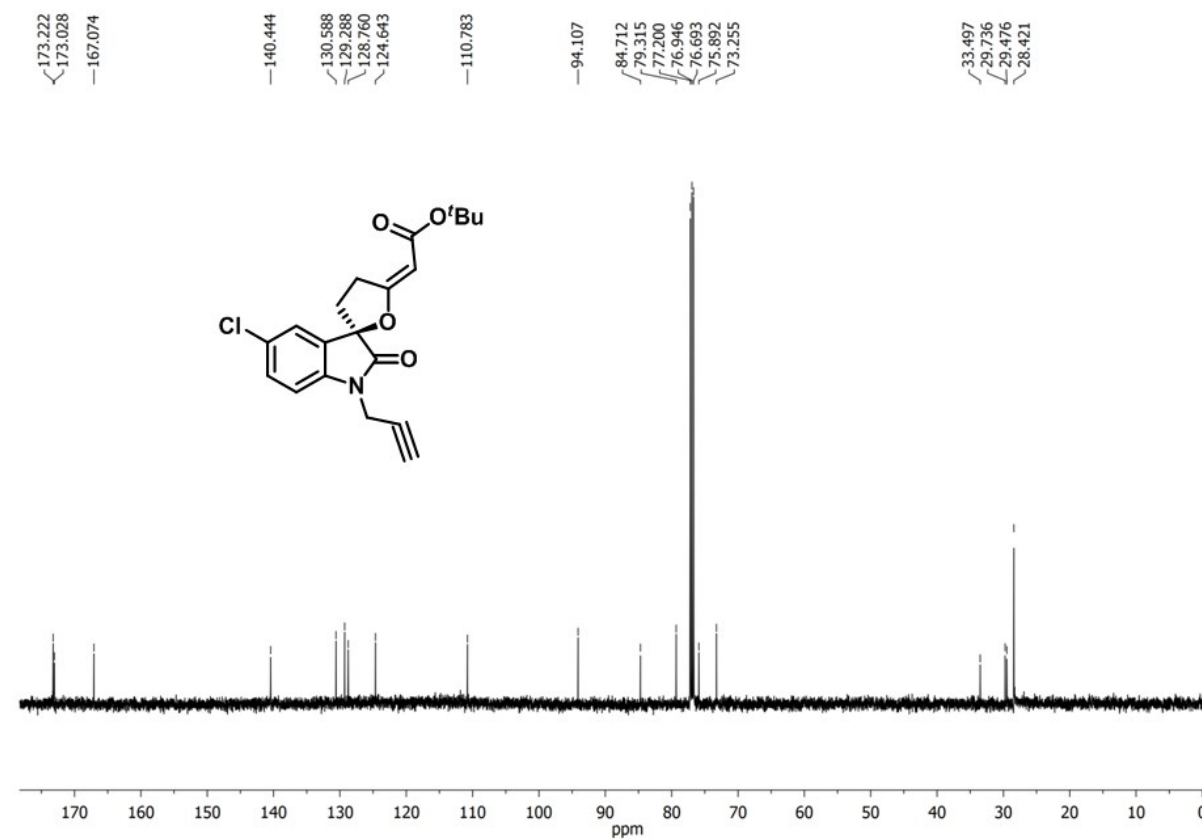

### $^1\text{H}$ NMR (500 MHz, $\text{CDCl}_3$ ) of Compound 22

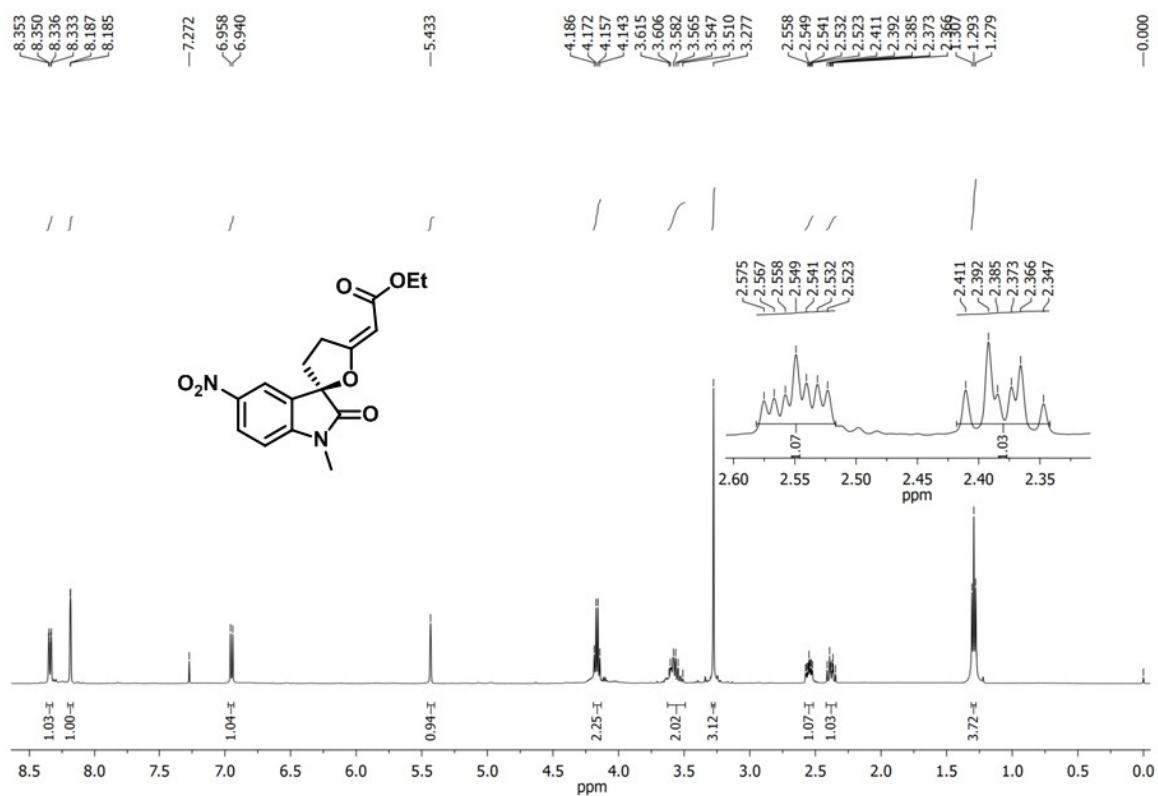

### $^{13}\text{C}$ NMR (126 MHz, $\text{CDCl}_3$ ) of Compound 22

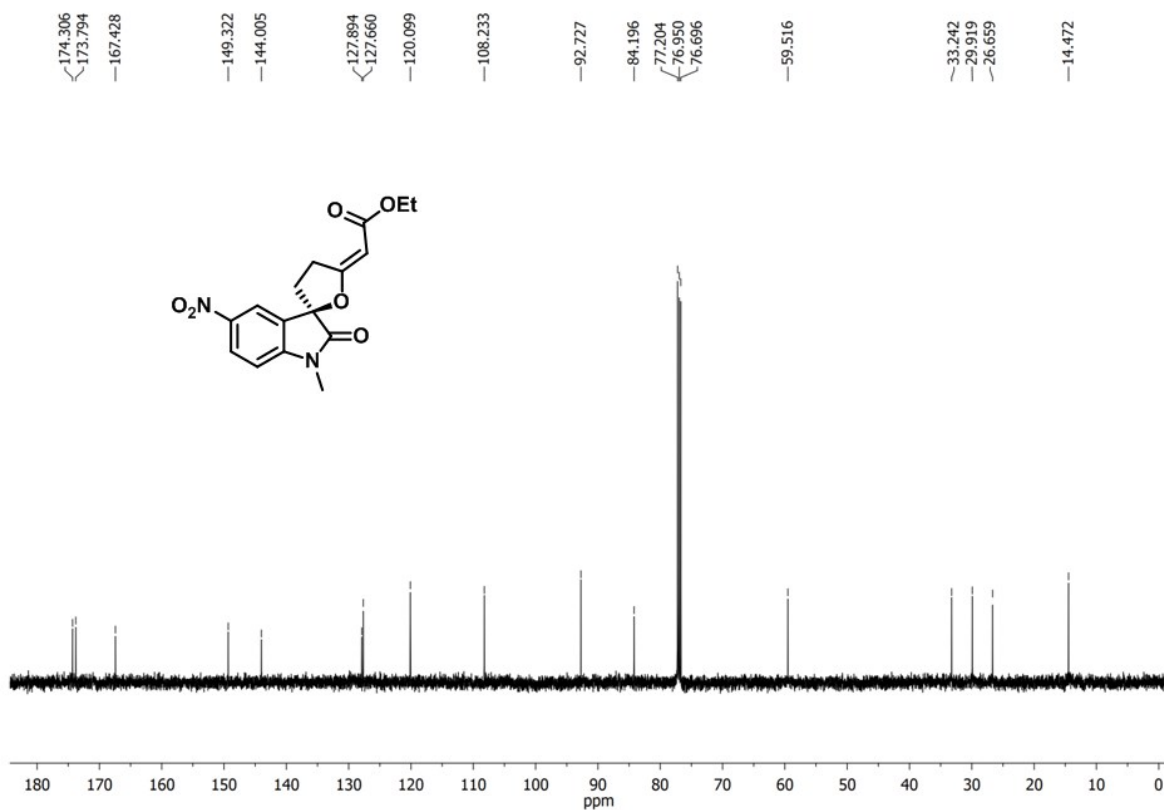

## 5. ORTEP of compound 14

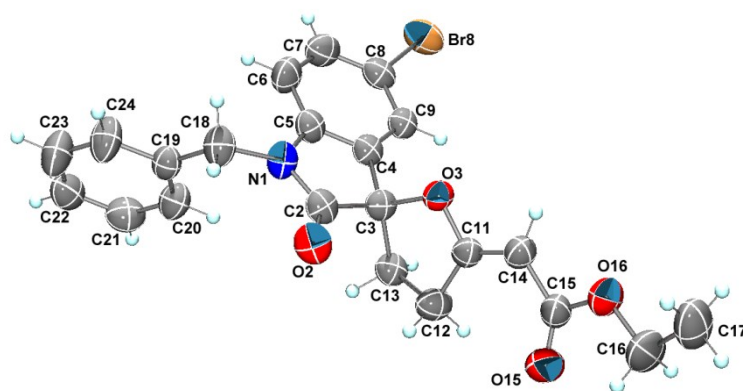

CCDC 969501
